# Supplementary material for: Oxyanion clusters with antielectrostatic hydrogen bonding (AEHB) in tetraalkylammonium hypodiphosphates
Source: Royal Society of Chemistry journal article supplement (doi:10.1039/c8ce00880a), 2018-01-01
Supplement: c8ce00880a1.pdf [file c8ce00880a1.pdf]

## Oxyanion clusters with antielectrostatic hydrogen bonding (AEHB) in tetraalkylammonium hypodiphosphates †

Marzieh Emami,<sup>a,b</sup> Katarzyna Ślepokura,<sup>\*b</sup> Monika Trzebiatowska,<sup>c</sup> Nader Noshiranzadeh,<sup>a</sup>  
and Vasyl Kinzhybalov<sup>\*c</sup>

<sup>a</sup>Department of Chemistry, Faculty of Sciences, University of Zanjan, 45195-313, Zanjan, Iran.

<sup>b</sup>Faculty of Chemistry, University of Wrocław, Joliot-Curie 14, 50-383 Wrocław, Poland.

<sup>c</sup>Institute of Low Temperature and Structure Research, Polish Academy of Science, 50-422 Wrocław, Poland.

E-mail: kinzhybalov@gmail.com

### Content:

|                                                               |               |
|---------------------------------------------------------------|---------------|
| 1. 1. Experimental and calculated powder diffraction patterns | page S2       |
| 2. TG/DTA curves                                              | page S3       |
| 3. Crystallographic plots                                     | pages S4–S7   |
| 4. IR spectra                                                 | pages S8–S9   |
| 5. Crystallographic data                                      | pages S10–S23 |
| 6. IR data                                                    | page S24      |

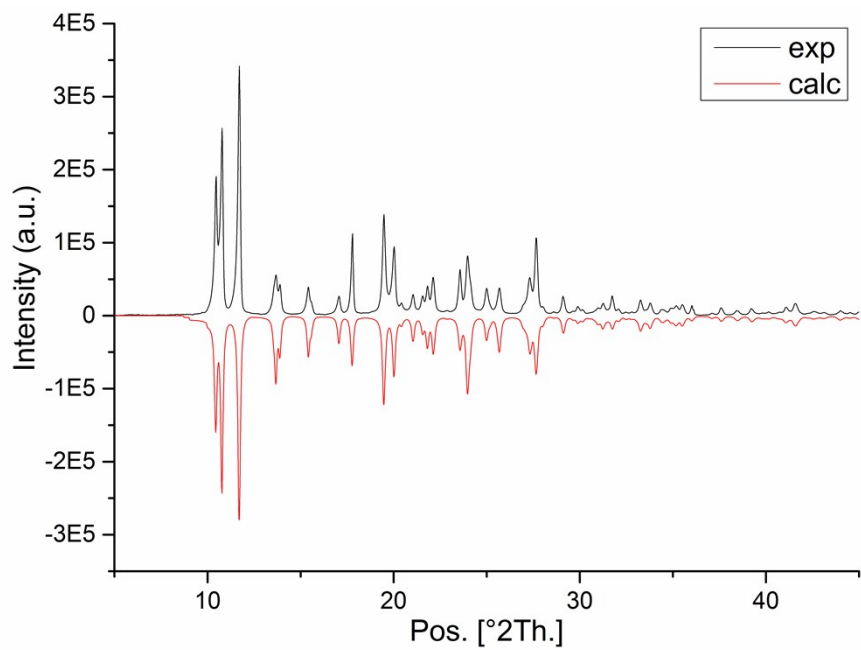

a)

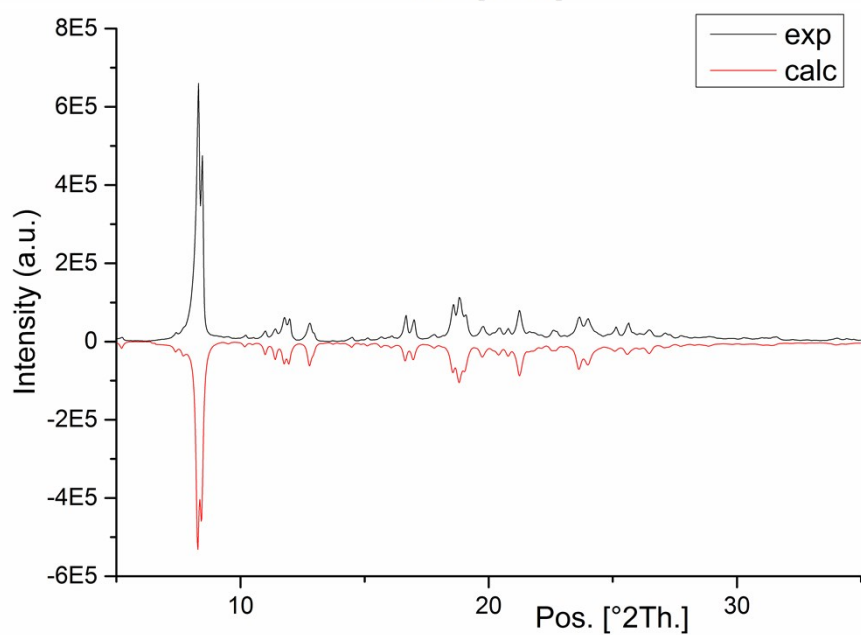

b)

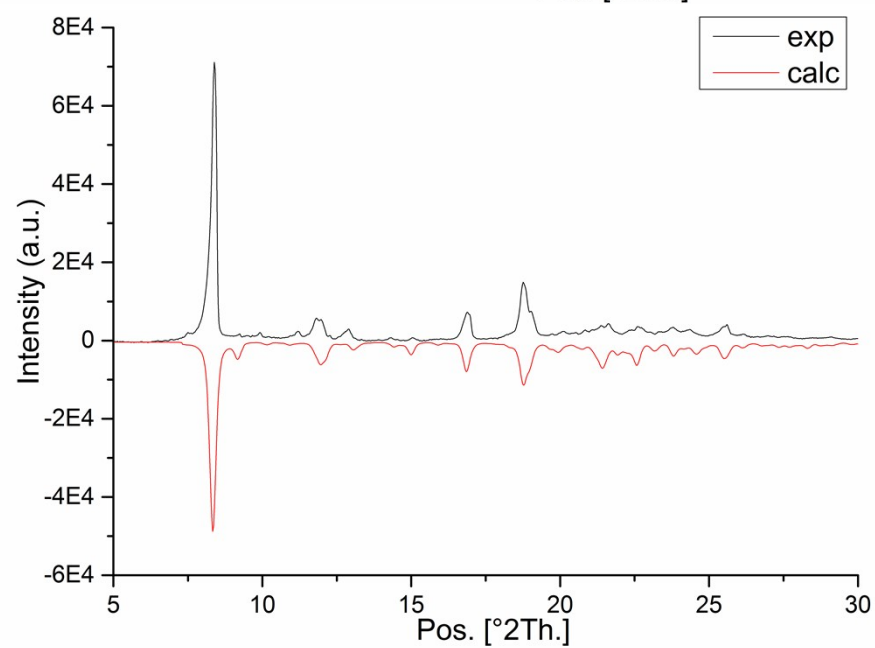

c)

**Figure S1.** Experimental and calculated powder diffraction patterns for (a)2, (b)4 and (c)5.

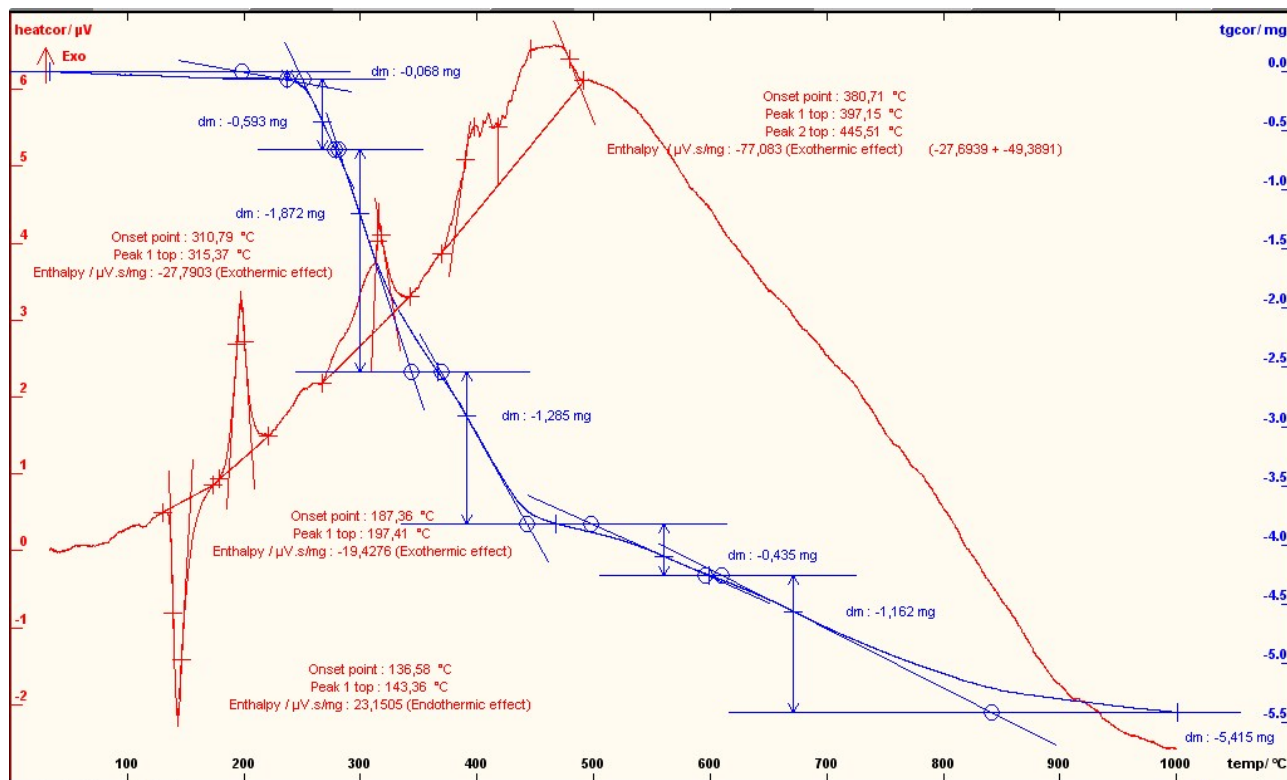

a)

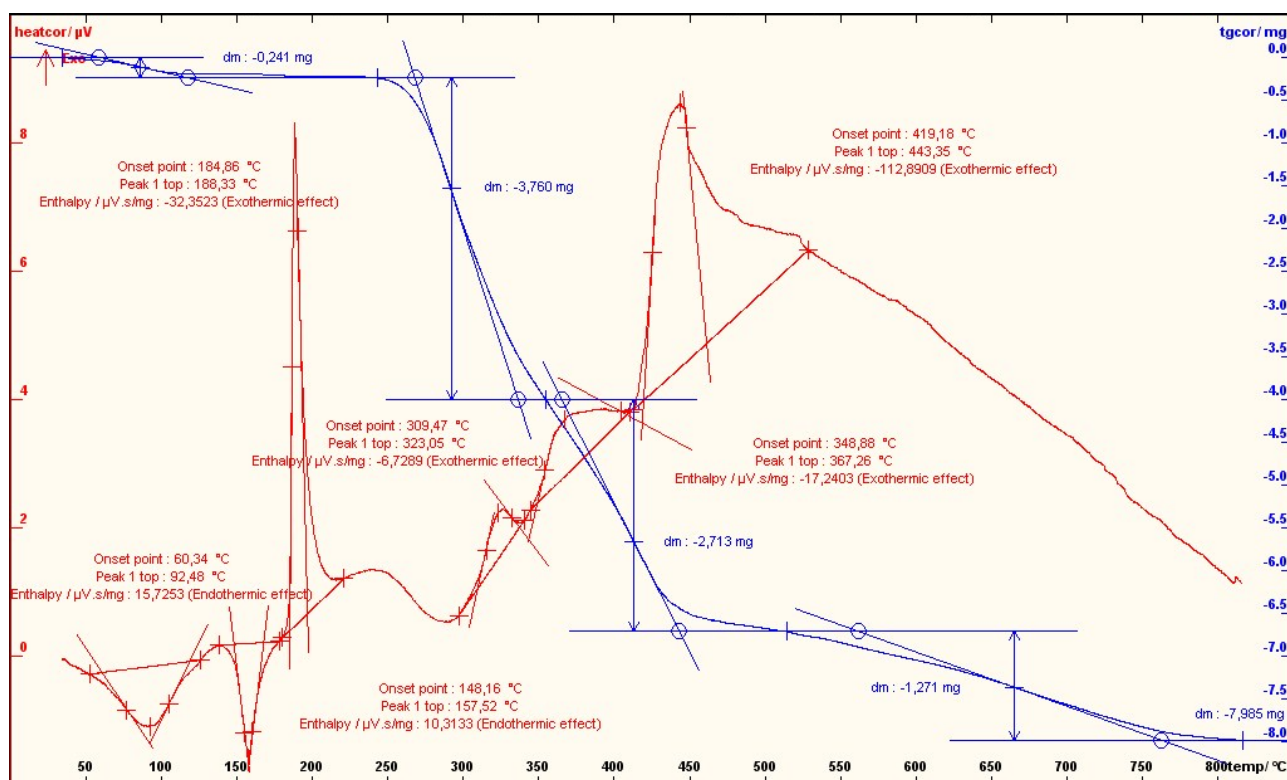

b)

Figure S2. TG/DTA curves (blue and red, respectively) of 2 and 4.

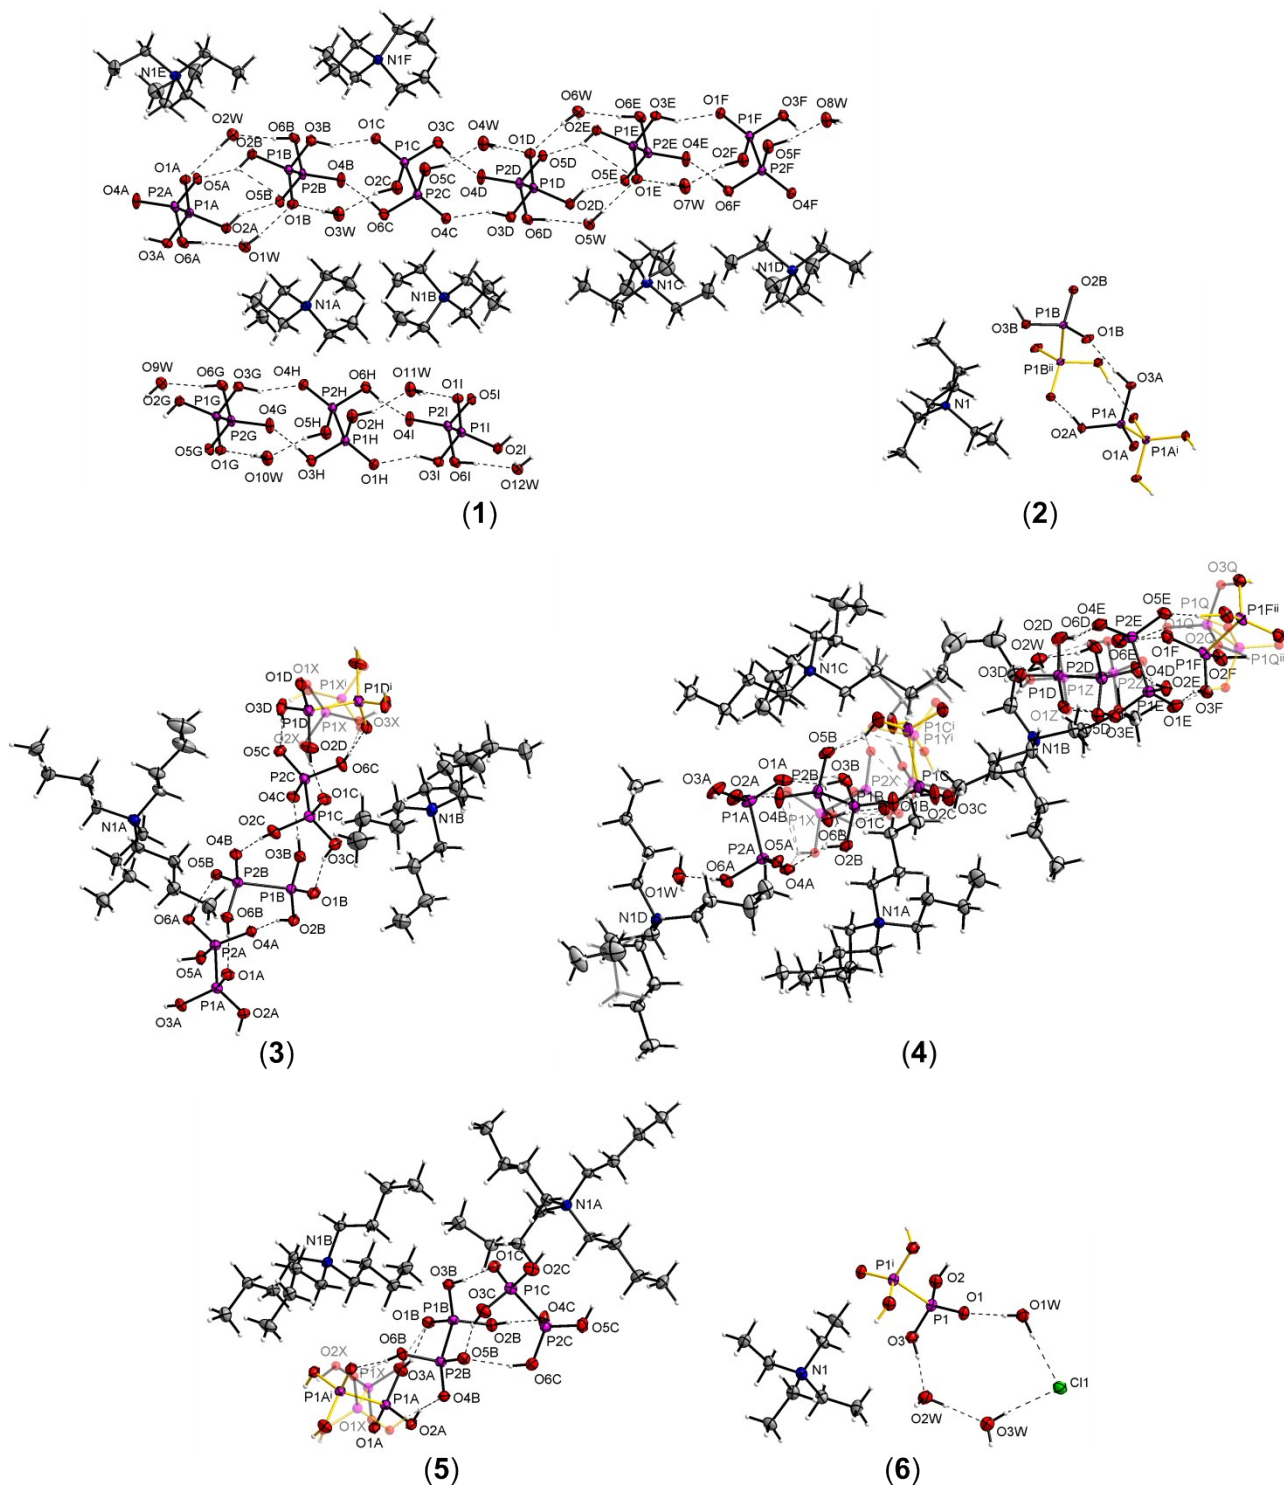

**Figure S3.** Asymmetric units of 1–6 (black bonds), showing the atom-numbering schemes (for P, O and N atoms) and symmetry-independent hydrogen bonds (dashed lines). Displacement ellipsoids are shown at the 50% probability level. Two positions of the disordered hypodiphosphates in 3 and 4 are shown: with higher occupancy factors – black bonds and labels; with lower SOFs (refined isotropically) – transparent bonds and atoms (shown as spheres) and grey labels. Symmetry codes for 2, 3, 4, 5 and 6 are given in Tables S2–S6.

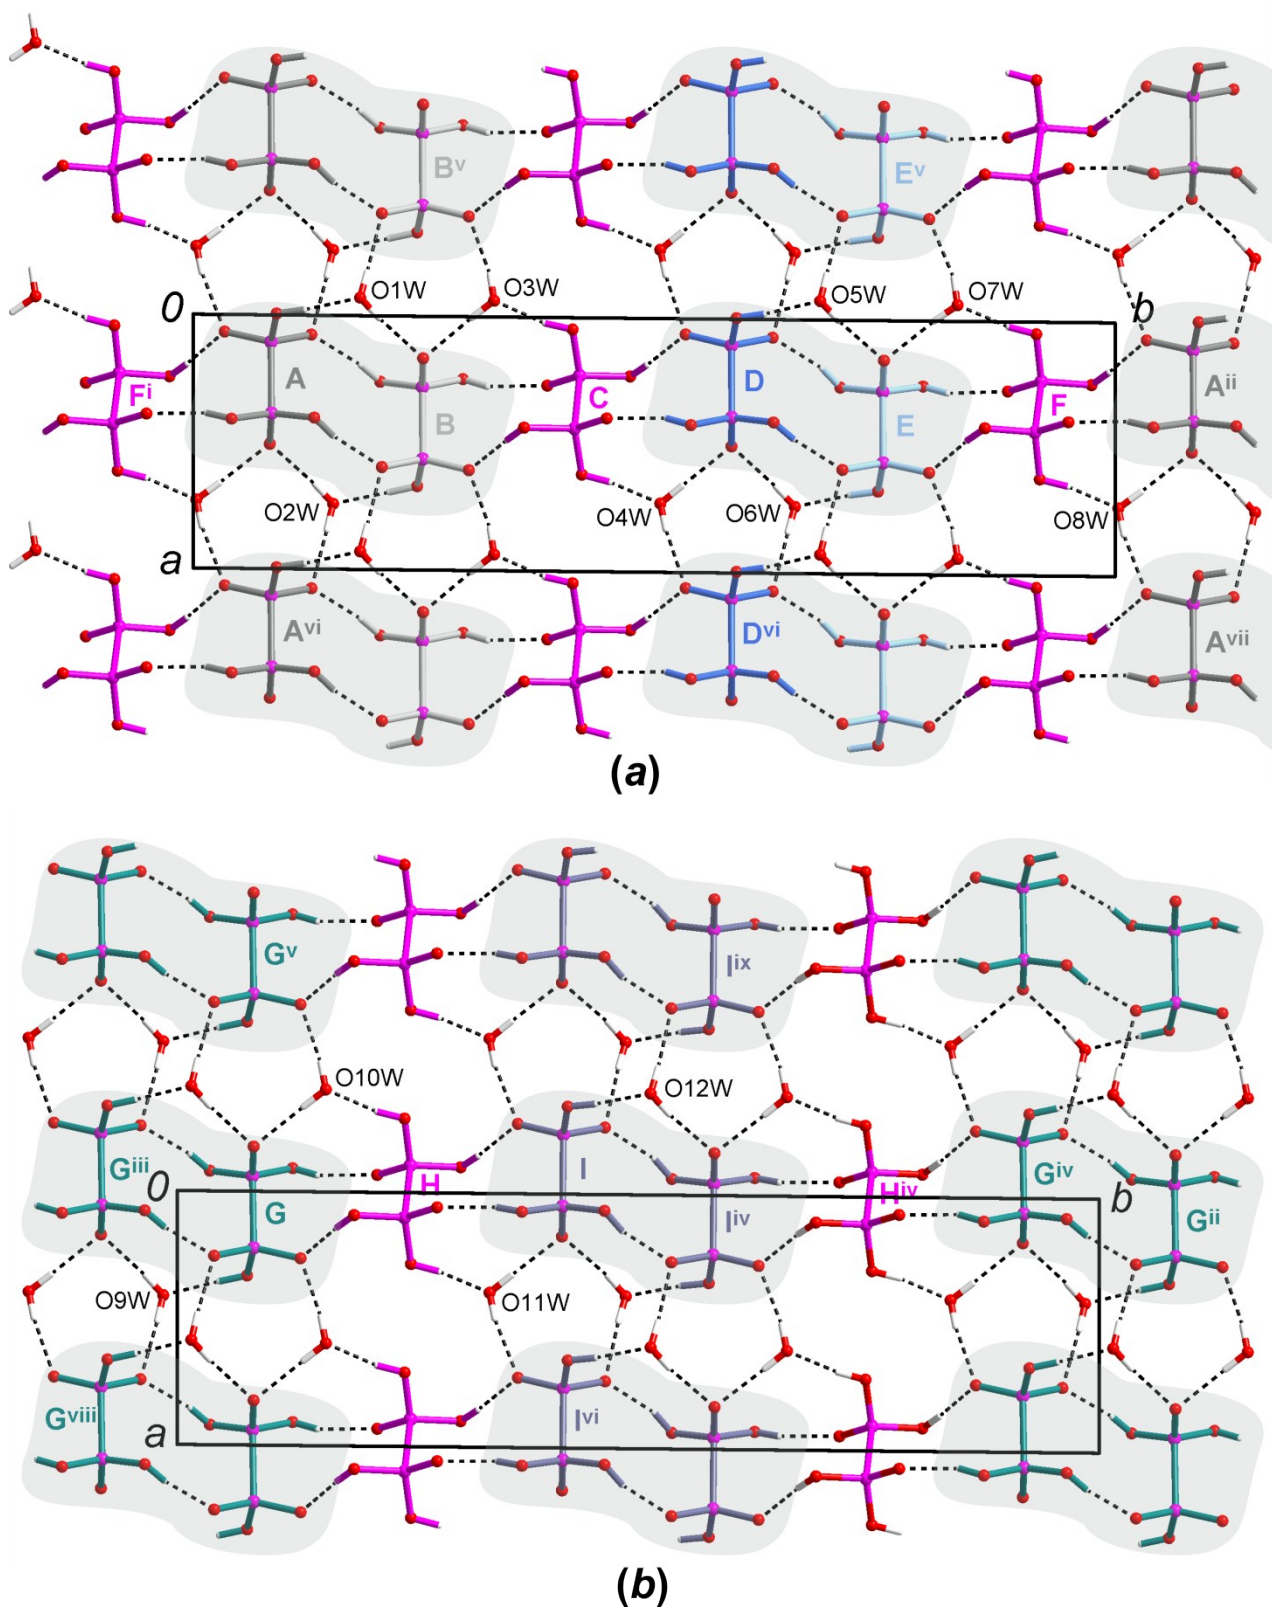

**Figure S4.** Two different  $\text{H}_3\text{P}_2\text{O}_6^-/\text{H}_4\text{P}_2\text{O}_6$  layers in **1**. Crystallographically independent anions are drawn in different colours. Molecules of hypodiphosphoric acid are marked in pink. Hydrogen bonds shown as dashed lines. Symmetry codes: (i)  $x, y-1, z$ ; (ii)  $x, y+1, z$ ; (iii)  $-x, -y, -z+1$ ; (iv)  $-x, -y+1, -z+1$ ; (v)  $x-1, y, z$ ; (vi)  $x+1, y, z$ ; (vii)  $x+1, y+1, z$ ; (viii)  $-x+1, -y, -z+1$ ; (ix)  $-x-1, -y+1, -z+1$ . AEHB dimers are shadowed with grey background.

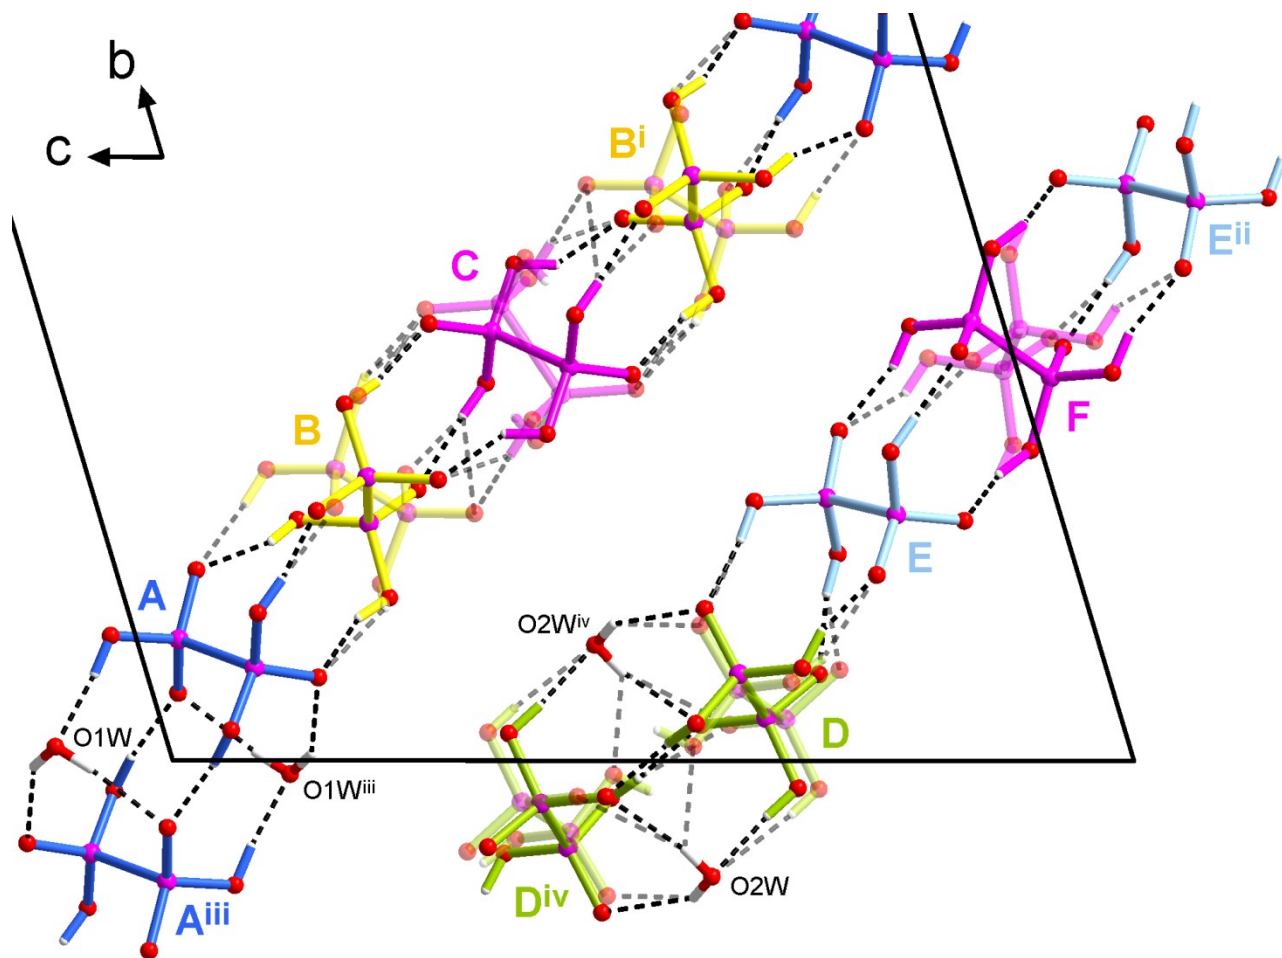

**Figure S5.** Two different chains in **4** formed by  $\text{H}_3\text{P}_2\text{O}_6^-$  (**4-A,B,D,E**) monoanions, and  $\text{H}_4\text{P}_2\text{O}_6$  (**4-C,F**; pink) molecules linked by  $\text{O-H}\cdots\text{O}$  hydrogen bonds (dashed lines). Disorder of anions and acid molecules is shown: with higher occupancy factors – thick bonds and black labels; with lower SOFs (refined isotropically) – transparent bonds and atoms and grey label. Symmetry codes: (i)  $-x+1, -y+1, -z+1$ ; (ii)  $-x, -y+1, -z$ ; (iii)  $-x+1, -y, -z+2$ ; (iv)  $-x, -y, -z+1$ .

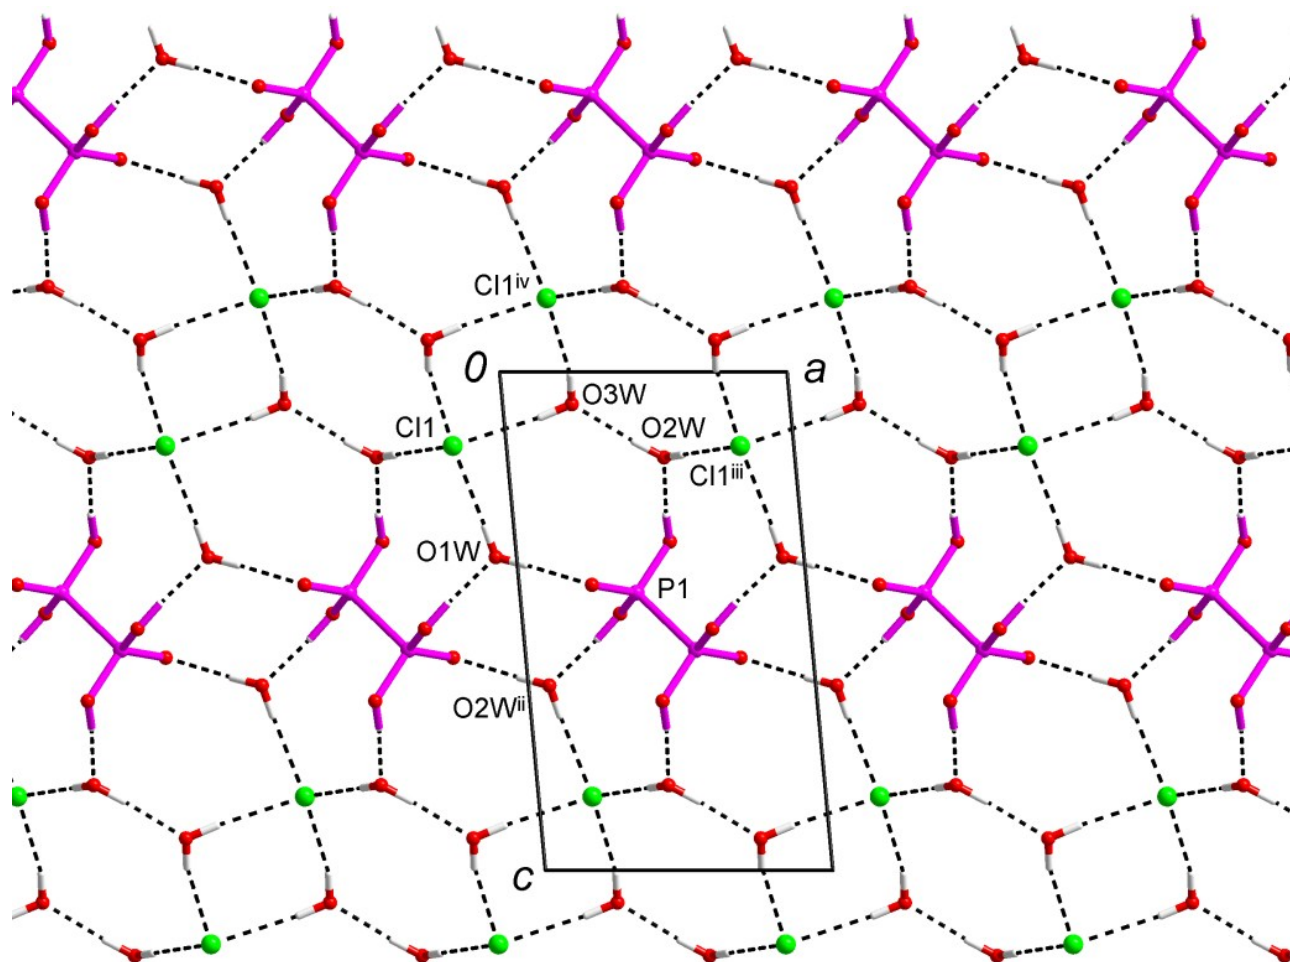

**Figure S6.** Chains of hydrogen-bonded (dashed lines)  $\text{H}_4\text{P}_2\text{O}_6/\text{H}_2\text{O}$  molecules running down the  $a$  axis in **6** joined with each other by  $\text{O}-\text{H}\cdots\text{O}$  and  $\text{O}-\text{H}\cdots\text{Cl}$  hydrogen bonds giving rise to layers parallel to (011) plane. Symmetry codes: (ii)  $-x, -y+1, -z+1$ ; (iii)  $x+1, y, z$ ; (iv)  $-x, -y+2, -z$ .

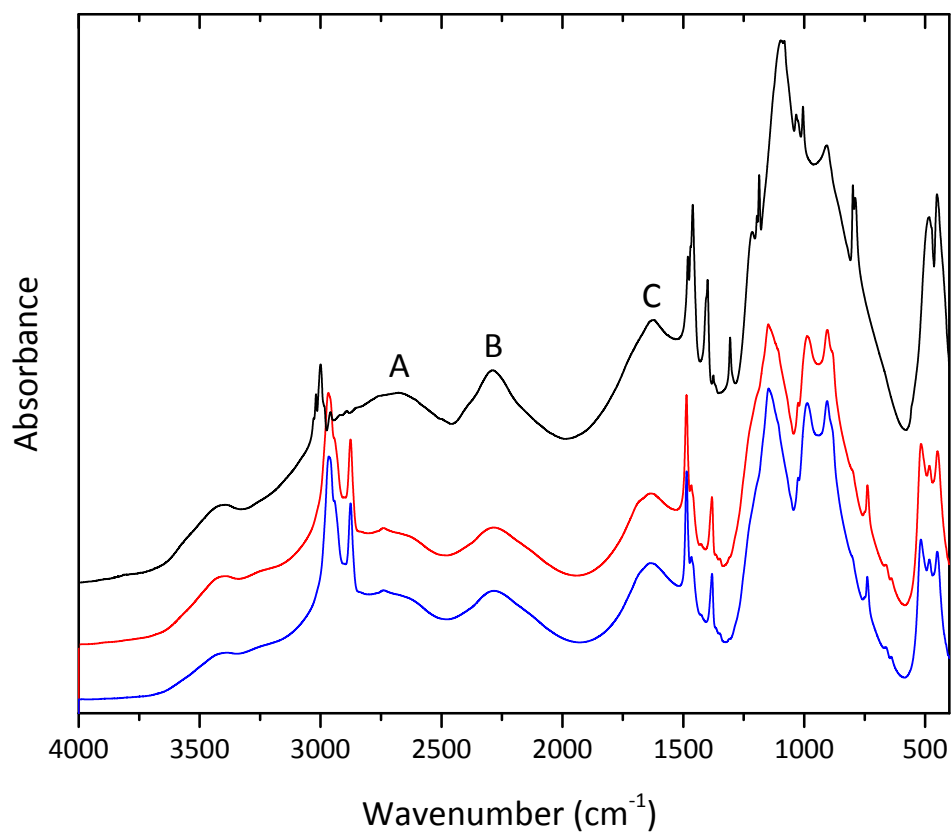

**Figure S7.** The IR spectra of the compounds **2** (black), **4** (red) and **5** (blue). The letters A, B and C denote the appearance of the structure characteristic for strong hydrogen bonds.

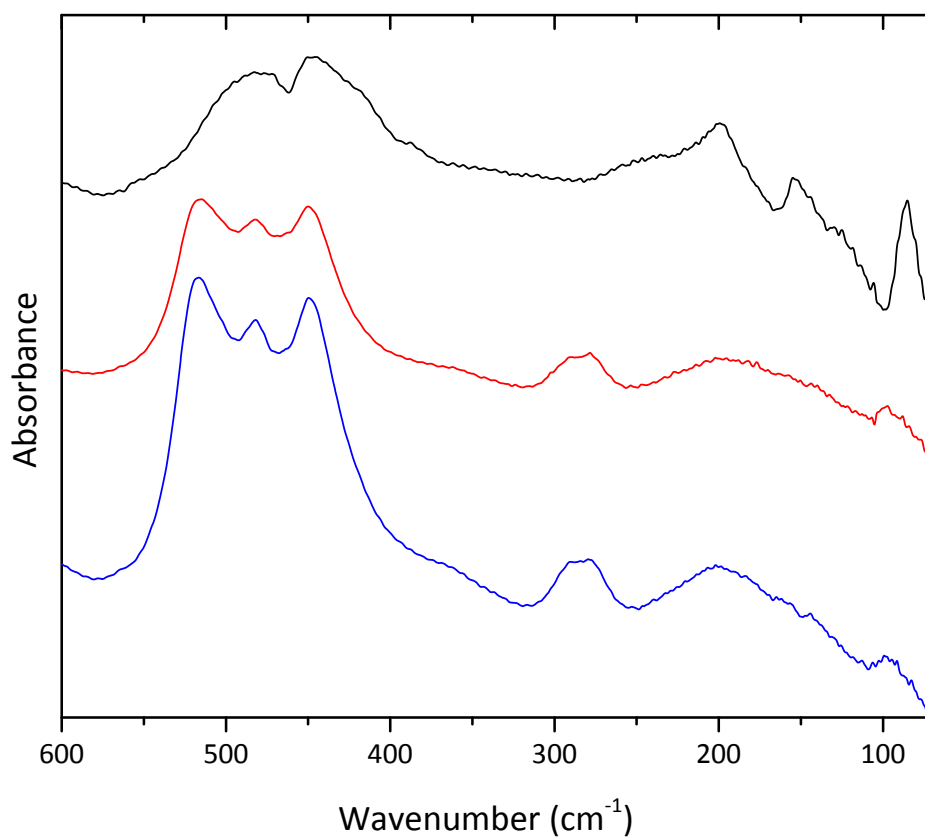

**Figure S8.** The far IR spectra of the compounds **2** (black), **4** (red) and **5** (blue).



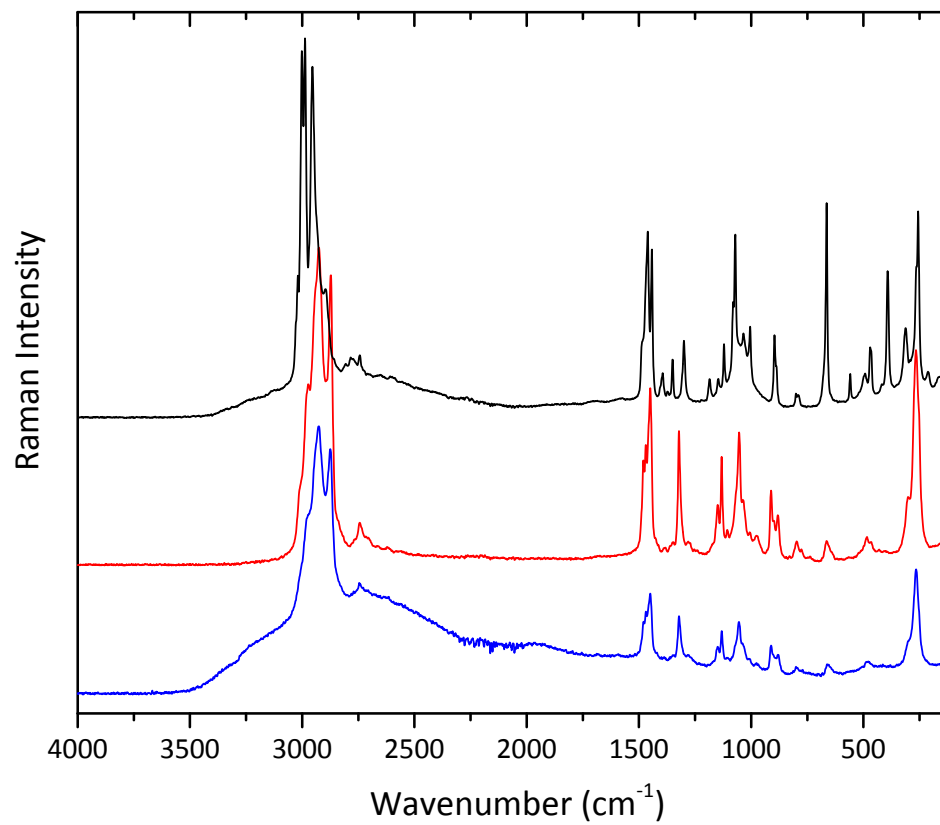

**Figure S9.** The Raman spectra of the compounds **2** (black), **4** (red) and **5** (blue).

**Table S1.** Selected geometric parameters (Å, °) for [(Et<sub>4</sub>N)(H<sub>3</sub>P<sub>2</sub>O<sub>6</sub>)]·0.5H<sub>4</sub>P<sub>2</sub>O<sub>6</sub>·2H<sub>2</sub>O(**1**). H<sub>4</sub>P<sub>2</sub>O<sub>6</sub> molecules are marked in pink.

|             | <b>1-A</b><br>(H <sub>3</sub> P <sub>2</sub> O <sub>6</sub> <sup>-</sup> ) | <b>1-B</b><br>(H <sub>3</sub> P <sub>2</sub> O <sub>6</sub> <sup>-</sup> ) | <b>1-C</b><br>(H <sub>4</sub> P <sub>2</sub> O <sub>6</sub> ) | <b>1-D</b><br>(H <sub>3</sub> P <sub>2</sub> O <sub>6</sub> <sup>-</sup> ) | <b>1-E</b><br>(H <sub>3</sub> P <sub>2</sub> O <sub>6</sub> <sup>-</sup> ) | <b>1-F</b><br>(H <sub>4</sub> P <sub>2</sub> O <sub>6</sub> ) | <b>1-G</b><br>(H <sub>3</sub> P <sub>2</sub> O <sub>6</sub> <sup>-</sup> ) | <b>1-H</b><br>(H <sub>4</sub> P <sub>2</sub> O <sub>6</sub> ) | <b>1-I</b><br>(H <sub>3</sub> P <sub>2</sub> O <sub>6</sub> <sup>-</sup> ) |
|-------------|----------------------------------------------------------------------------|----------------------------------------------------------------------------|---------------------------------------------------------------|----------------------------------------------------------------------------|----------------------------------------------------------------------------|---------------------------------------------------------------|----------------------------------------------------------------------------|---------------------------------------------------------------|----------------------------------------------------------------------------|
| P1–P2       | 2.1812(8)                                                                  | 2.1824(8)                                                                  | 2.1791(8)                                                     | 2.1817(8)                                                                  | 2.1817(8)                                                                  | 2.1797(8)                                                     | 2.1832(8)                                                                  | 2.1791(8)                                                     | 2.1796(8)                                                                  |
| P1–O1       | 1.4928(11)                                                                 | 1.4949(11)                                                                 | 1.4912(11)                                                    | 1.4956(11)                                                                 | 1.4927(11)                                                                 | 1.4920(11)                                                    | 1.4946(11)                                                                 | 1.4890(11)                                                    | 1.4918(11)                                                                 |
| P1–O2       | 1.5490(11)                                                                 | 1.5439(11)                                                                 | 1.5464(12)                                                    | 1.5457(11)                                                                 | 1.5478(11)                                                                 | 1.5470(12)                                                    | 1.5456(11)                                                                 | 1.5470(12)                                                    | 1.5475(11)                                                                 |
| P1–O3       | 1.5505(12)                                                                 | 1.5508(12)                                                                 | 1.5586(12)                                                    | 1.5497(12)                                                                 | 1.5489(11)                                                                 | 1.5582(12)                                                    | 1.5506(12)                                                                 | 1.5586(12)                                                    | 1.5478(11)                                                                 |
| P2–O4       | 1.5045(11)                                                                 | 1.5072(11)                                                                 | 1.4897(11)                                                    | 1.5060(11)                                                                 | 1.5057(11)                                                                 | 1.4921(11)                                                    | 1.5049(11)                                                                 | 1.4891(11)                                                    | 1.5061(11)                                                                 |
| P2–O5       | 1.5122(11)                                                                 | 1.5159(12)                                                                 | 1.5477(12)                                                    | 1.5131(12)                                                                 | 1.5108(11)                                                                 | 1.5491(12)                                                    | 1.5128(12)                                                                 | 1.5482(12)                                                    | 1.5140(11)                                                                 |
| P2–O6       | 1.5648(11)                                                                 | 1.5678(11)                                                                 | 1.5571(12)                                                    | 1.5678(11)                                                                 | 1.5667(11)                                                                 | 1.5551(12)                                                    | 1.5648(11)                                                                 | 1.5570(12)                                                    | 1.5654(11)                                                                 |
| O1–P1–O2    | 115.98(6)                                                                  | 116.32(6)                                                                  | 115.85(7)                                                     | 116.39(6)                                                                  | 116.07(6)                                                                  | 115.48(7)                                                     | 115.88(6)                                                                  | 115.74(7)                                                     | 116.32(6)                                                                  |
| O1–P1–O3    | 114.95(6)                                                                  | 114.70(7)                                                                  | 111.59(7)                                                     | 114.60(7)                                                                  | 115.02(7)                                                                  | 111.79(7)                                                     | 114.57(7)                                                                  | 111.64(6)                                                     | 115.10(7)                                                                  |
| O2–P1–O3    | 103.27(6)                                                                  | 103.28(7)                                                                  | 106.84(7)                                                     | 103.22(7)                                                                  | 103.17(6)                                                                  | 107.05(7)                                                     | 103.32(6)                                                                  | 107.02(7)                                                     | 103.16(6)                                                                  |
| O1–P1–P2    | 110.96(5)                                                                  | 109.93(5)                                                                  | 109.42(5)                                                     | 110.02(5)                                                                  | 110.97(5)                                                                  | 109.50(5)                                                     | 110.30(5)                                                                  | 109.63(5)                                                     | 110.68(5)                                                                  |
| O2–P1–P2    | 104.57(5)                                                                  | 104.50(5)                                                                  | 106.85(6)                                                     | 104.46(5)                                                                  | 104.55(5)                                                                  | 106.87(6)                                                     | 105.02(5)                                                                  | 106.95(5)                                                     | 104.17(5)                                                                  |
| O3–P1–P2    | 106.09(5)                                                                  | 107.23(5)                                                                  | 105.72(5)                                                     | 107.27(5)                                                                  | 106.00(5)                                                                  | 105.58(5)                                                     | 106.90(5)                                                                  | 105.25(5)                                                     | 106.33(5)                                                                  |
| O4–P2–O5    | 116.48(7)                                                                  | 116.51(7)                                                                  | 115.86(7)                                                     | 116.61(7)                                                                  | 116.43(7)                                                                  | 115.48(7)                                                     | 116.53(7)                                                                  | 115.67(7)                                                     | 116.55(7)                                                                  |
| O4–P2–O6    | 108.23(7)                                                                  | 108.33(7)                                                                  | 111.56(7)                                                     | 108.28(7)                                                                  | 108.26(7)                                                                  | 111.74(7)                                                     | 108.15(7)                                                                  | 111.73(7)                                                     | 108.32(7)                                                                  |
| O5–P2–O6    | 110.58(6)                                                                  | 110.16(6)                                                                  | 106.92(7)                                                     | 110.21(6)                                                                  | 110.63(6)                                                                  | 107.13(7)                                                     | 110.52(6)                                                                  | 106.74(7)                                                     | 110.16(6)                                                                  |
| O4–P2–P1    | 107.79(5)                                                                  | 108.10(5)                                                                  | 109.39(5)                                                     | 108.16(5)                                                                  | 107.84(5)                                                                  | 109.58(5)                                                     | 107.78(5)                                                                  | 109.46(5)                                                     | 108.04(5)                                                                  |
| O5–P2–P1    | 107.42(5)                                                                  | 107.04(5)                                                                  | 106.86(6)                                                     | 106.93(5)                                                                  | 107.38(5)                                                                  | 106.83(5)                                                     | 107.08(5)                                                                  | 106.71(5)                                                     | 107.40(5)                                                                  |
| O6–P2–P1    | 105.79(5)                                                                  | 106.21(5)                                                                  | 105.68(6)                                                     | 106.14(5)                                                                  | 105.74(5)                                                                  | 105.51(5)                                                     | 106.28(5)                                                                  | 105.98(5)                                                     | 105.83(5)                                                                  |
| O1–P1–P2–O4 | 68.58(7)                                                                   | –69.28(7)                                                                  | –179.79(5)                                                    | 69.29(7)                                                                   | –68.43(7)                                                                  | 179.80(5)                                                     | –70.25(7)                                                                  | –179.00(5)                                                    | 68.17(7)                                                                   |
| O2–P1–P2–O4 | –165.68(7)                                                                 | 165.21(7)                                                                  | –53.65(7)                                                     | –165.08(7)                                                                 | 165.72(7)                                                                  | –54.45(7)                                                     | 164.22(7)                                                                  | 54.79(7)                                                      | –166.09(7)                                                                 |
| O3–P1–P2–O4 | –56.91(7)                                                                  | 56.02(7)                                                                   | 59.91(7)                                                      | –55.97(7)                                                                  | 57.09(7)                                                                   | 59.29(7)                                                      | 54.89(7)                                                                   | –58.80(7)                                                     | –57.51(7)                                                                  |
| O1–P1–P2–O5 | –57.69(7)                                                                  | 56.97(7)                                                                   | 54.06(7)                                                      | –57.06(7)                                                                  | 57.77(7)                                                                   | 54.02(7)                                                      | 55.85(7)                                                                   | –53.15(7)                                                     | –58.33(7)                                                                  |
| O2–P1–P2–O5 | 68.05(6)                                                                   | –68.55(6)                                                                  | –179.79(5)                                                    | 68.57(6)                                                                   | –68.07(6)                                                                  | 179.78(5)                                                     | –69.68(7)                                                                  | –179.35(5)                                                    | 67.42(6)                                                                   |
| O3–P1–P2–O5 | 176.83(6)                                                                  | –177.73(6)                                                                 | –66.24(7)                                                     | 177.69(6)                                                                  | –176.70(6)                                                                 | –66.48(7)                                                     | –179.00(6)                                                                 | 67.05(7)                                                      | 176.00(6)                                                                  |
| O1–P1–P2–O6 | –175.83(6)                                                                 | 174.65(6)                                                                  | –59.57(7)                                                     | –174.70(6)                                                                 | 175.93(6)                                                                  | –59.76(7)                                                     | 174.00(6)                                                                  | 60.36(7)                                                      | –175.99(6)                                                                 |
| O2–P1–P2–O6 | –50.08(7)                                                                  | 49.13(7)                                                                   | 66.58(7)                                                      | –49.07(7)                                                                  | 50.08(6)                                                                   | 65.99(7)                                                      | 48.47(7)                                                                   | –65.84(7)                                                     | –50.25(7)                                                                  |
| O3–P1–P2–O6 | 58.69(7)                                                                   | –60.05(7)                                                                  | –179.87(5)                                                    | 60.04(7)                                                                   | –58.55(7)                                                                  | 179.73(5)                                                     | –60.85(7)                                                                  | –179.44(5)                                                    | 58.33(7)                                                                   |

**Table S2.** Selected geometric parameters (Å, °) for [(Et<sub>4</sub>N)<sub>2</sub>(H<sub>2</sub>P<sub>2</sub>O<sub>6</sub>)]·H<sub>4</sub>P<sub>2</sub>O<sub>6</sub> (**2**). H<sub>4</sub>P<sub>2</sub>O<sub>6</sub> molecule is marked in pink.

|                                                                            | <b>2-A</b><br>(H <sub>4</sub> P <sub>2</sub> O <sub>6</sub> ) | <b>2-B</b><br>(H <sub>2</sub> P <sub>2</sub> O <sub>6</sub> <sup>2-</sup> ) |
|----------------------------------------------------------------------------|---------------------------------------------------------------|-----------------------------------------------------------------------------|
| P1A–P1A <sup>i</sup> / P1B–P1B <sup>ii</sup>                               | 2.1795(11)                                                    | 2.1863(12)                                                                  |
| P1–O1                                                                      | 1.4931(12)                                                    | 1.5026(13)                                                                  |
| P1–O2                                                                      | 1.5456(12)                                                    | 1.5169(11)                                                                  |
| P1–O3                                                                      | 1.5516(11)                                                    | 1.5685(12)                                                                  |
| O1–P1–O2                                                                   | 111.58(6)                                                     | 114.75(7)                                                                   |
| O1–P1–O3                                                                   | 112.34(7)                                                     | 108.78(7)                                                                   |
| O2–P1–O3                                                                   | 110.69(6)                                                     | 110.89(6)                                                                   |
| O1–P1–P1A <sup>i</sup> /B <sup>ii</sup>                                    | 109.42(5)                                                     | 108.80(6)                                                                   |
| O2–P1–P1A <sup>i</sup> /B <sup>ii</sup>                                    | 107.66(6)                                                     | 108.80(6)                                                                   |
| O3–P1–P1A <sup>i</sup> /B <sup>ii</sup>                                    | 104.82(6)                                                     | 104.29(6)                                                                   |
| O1–P1–P1A <sup>i</sup> /B <sup>ii</sup> –O1A <sup>i</sup> /B <sup>ii</sup> | 180                                                           | 180                                                                         |
| O2–P1–P1A <sup>i</sup> /B <sup>ii</sup> –O1A <sup>i</sup> /B <sup>ii</sup> | 58.56(7)                                                      | –54.34(8)                                                                   |
| O3–P1–P1A <sup>i</sup> /B <sup>ii</sup> –O1A <sup>i</sup> /B <sup>ii</sup> | –59.33(7)                                                     | 64.04(8)                                                                    |
| O1–P1–P1A <sup>i</sup> /B <sup>ii</sup> –O2A <sup>i</sup> /B <sup>ii</sup> | –58.56 (7)                                                    | 54.34(8)                                                                    |
| O2–P1–P1A <sup>i</sup> /B <sup>ii</sup> –O2A <sup>i</sup> /B <sup>ii</sup> | 180                                                           | 180                                                                         |
| O3–P1–P1A <sup>i</sup> /B <sup>ii</sup> –O2A <sup>i</sup> /B <sup>ii</sup> | 62.11(7)                                                      | –61.62(7)                                                                   |
| O1–P1–P1A <sup>i</sup> /B <sup>ii</sup> –O3A <sup>i</sup> /B <sup>ii</sup> | 59.33(7)                                                      | –64.04(8)                                                                   |
| O2–P1–P1A <sup>i</sup> /B <sup>ii</sup> –O3A <sup>i</sup> /B <sup>ii</sup> | –62.11(7)                                                     | 61.62(7)                                                                    |
| O3–P1–P1A <sup>i</sup> /B <sup>ii</sup> –O3A <sup>i</sup> /B <sup>ii</sup> | 180                                                           | 180                                                                         |

Symmetry codes: (i)  $-x+1, -y, -z+1$ ; (ii)  $-x+1, -y+1, -z+1$ .

**Table S3.** Selected geometric parameters (Å, °) for [(Bu<sub>4</sub>N)(H<sub>3</sub>P<sub>2</sub>O<sub>6</sub>)]·0.75H<sub>4</sub>P<sub>2</sub>O<sub>6</sub> (**3**). H<sub>4</sub>P<sub>2</sub>O<sub>6</sub> molecules are marked in pink.

|                                                                | <b>3-A</b><br>(H <sub>4</sub> P <sub>2</sub> O <sub>6</sub> ) | <b>3-B</b><br>(H <sub>3</sub> P <sub>2</sub> O <sub>6</sub> <sup>-</sup> ) | <b>3-C</b><br>(H <sub>3</sub> P <sub>2</sub> O <sub>6</sub> <sup>-</sup> ) | <b>3-D</b><br>(H <sub>4</sub> P <sub>2</sub> O <sub>6</sub> )<br>SOF = 0.887(3) |
|----------------------------------------------------------------|---------------------------------------------------------------|----------------------------------------------------------------------------|----------------------------------------------------------------------------|---------------------------------------------------------------------------------|
| P1–P2 / P1 <i>D</i> –P1 <i>D</i> <sup>i</sup>                  | 2.1722(13)                                                    | 2.1885(13)                                                                 | 2.1764(13)                                                                 | 2.179(2)                                                                        |
| P1–O1                                                          | 1.478(2)                                                      | 1.484(2)                                                                   | 1.488(2)                                                                   | 1.480(3)                                                                        |
| P1–O2                                                          | 1.547(2)                                                      | 1.542(2)                                                                   | 1.531(2)                                                                   | 1.553(4)                                                                        |
| P1–O3                                                          | 1.548(2)                                                      | 1.560(2)                                                                   | 1.548(2)                                                                   | 1.557(3)                                                                        |
| P2–O4                                                          | 1.498(2)                                                      | 1.494(2)                                                                   | 1.509(2)                                                                   | –                                                                               |
| P2–O5                                                          | 1.533(2)                                                      | 1.519(2)                                                                   | 1.517(2)                                                                   | –                                                                               |
| P2–O6                                                          | 1.547(2)                                                      | 1.554(2)                                                                   | 1.557(2)                                                                   | –                                                                               |
| O1–P1–O2                                                       | 111.90(14)                                                    | 111.36(13)                                                                 | 112.44(14)                                                                 | 112.7(2)                                                                        |
| O1–P1–O3                                                       | 110.96(13)                                                    | 113.95(13)                                                                 | 109.49(13)                                                                 | 108.8(3)                                                                        |
| O2–P1–O3                                                       | 110.67(13)                                                    | 105.95(14)                                                                 | 111.85(14)                                                                 | 111.5(2)                                                                        |
| O1–P1–P2/P1 <i>D</i> <sup>i</sup>                              | 108.14(10)                                                    | 109.60(11)                                                                 | 108.71(10)                                                                 | 111.5(2)                                                                        |
| O2–P1–P2/P1 <i>D</i> <sup>i</sup>                              | 105.46(10)                                                    | 109.62(10)                                                                 | 108.19(10)                                                                 | 106.6(2)                                                                        |
| O3–P1–P2/P1 <i>D</i> <sup>i</sup>                              | 109.52(10)                                                    | 106.15(10)                                                                 | 105.91(11)                                                                 | 105.60(14)                                                                      |
| O4–P2–O5                                                       | 111.56(13)                                                    | 113.08(13)                                                                 | 114.40(13)                                                                 | –                                                                               |
| O4–P2–O6                                                       | 115.60(13)                                                    | 109.57(13)                                                                 | 108.31(13)                                                                 | –                                                                               |
| O5–P2–O6                                                       | 107.51(13)                                                    | 111.83(13)                                                                 | 111.64(13)                                                                 | –                                                                               |
| O4–P2–P1                                                       | 107.58(10)                                                    | 109.32(10)                                                                 | 109.00(10)                                                                 | –                                                                               |
| O5–P2–P1                                                       | 109.29(10)                                                    | 106.98(10)                                                                 | 107.42(10)                                                                 | –                                                                               |
| O6–P2–P1                                                       | 104.99(10)                                                    | 105.74(10)                                                                 | 105.68(10)                                                                 | –                                                                               |
| O1–P1–P2/P1 <i>D</i> <sup>i</sup> –O4/O1 <i>D</i> <sup>i</sup> | 64.05(14)                                                     | 51.66(15)                                                                  | 174.18(14)                                                                 | 180                                                                             |
| O2–P1–P2/P1 <i>D</i> <sup>i</sup> –O4/O1 <i>D</i> <sup>i</sup> | –55.81(14)                                                    | 174.16(14)                                                                 | –63.45(14)                                                                 | 56.7(3)                                                                         |
| O3–P1–P2/P1 <i>D</i> <sup>i</sup> –O4/O1 <i>D</i> <sup>i</sup> | –174.93(13)                                                   | –71.82(15)                                                                 | 56.61(14)                                                                  | –62.0(3)                                                                        |
| O1–P1–P2/P1 <i>D</i> <sup>i</sup> –O5/O2 <i>D</i> <sup>i</sup> | –174.66(13)                                                   | 174.44(13)                                                                 | –61.36(14)                                                                 | –56.7(3)                                                                        |
| O2–P1–P2/P1 <i>D</i> <sup>i</sup> –O5/O2 <i>D</i> <sup>i</sup> | 65.48(14)                                                     | –63.06(14)                                                                 | 61.02(14)                                                                  | 180                                                                             |
| O3–P1–P2/P1 <i>D</i> <sup>i</sup> –O5/O2 <i>D</i> <sup>i</sup> | –53.64(14)                                                    | 50.95(14)                                                                  | –178.92(13)                                                                | 61.3(3)                                                                         |
| O1–P1–P2/P1 <i>D</i> <sup>i</sup> –O6/O3 <i>D</i> <sup>i</sup> | –59.60(14)                                                    | –66.22(14)                                                                 | 57.95(14)                                                                  | 62.0(3)                                                                         |
| O2–P1–P2/P1 <i>D</i> <sup>i</sup> –O6/O3 <i>D</i> <sup>i</sup> | –179.45(13)                                                   | 56.28(15)                                                                  | –179.67(13)                                                                | –61.3(3)                                                                        |
| O3–P1–P2/P1 <i>D</i> <sup>i</sup> –O6/O3 <i>D</i> <sup>i</sup> | 61.43(13)                                                     | 170.30(13)                                                                 | –59.61(14)                                                                 | 180                                                                             |

Symmetry code: (i)  $-x+1, -y+1, -z+1$ .

**Table S4.** Selected geometric parameters (Å, °) for [(Bu<sub>4</sub>N)(H<sub>3</sub>P<sub>2</sub>O<sub>6</sub>)]·0.25(H<sub>4</sub>P<sub>2</sub>O<sub>6</sub>)·0.52H<sub>2</sub>O (**4**). H<sub>4</sub>P<sub>2</sub>O<sub>6</sub> molecules are marked in pink.

|                                                                                      | <b>4-A</b><br>(H <sub>3</sub> P <sub>2</sub> O <sub>6</sub> <sup>-</sup> ) | <b>4-B</b><br>(H <sub>3</sub> P <sub>2</sub> O <sub>6</sub> <sup>-</sup> )<br>SOF = 0.8680(12) | <b>4-C</b><br>(H <sub>4</sub> P <sub>2</sub> O <sub>6</sub> )<br>SOF = 0.8680(12) | <b>4-D</b><br>(H <sub>3</sub> P <sub>2</sub> O <sub>6</sub> <sup>-</sup> )<br>SOF = 0.897(4) | <b>4-E</b><br>(H <sub>3</sub> P <sub>2</sub> O <sub>6</sub> <sup>-</sup> ) | <b>4-F</b><br>(H <sub>4</sub> P <sub>2</sub> O <sub>6</sub> )<br>SOF = 0.9273(18) |
|--------------------------------------------------------------------------------------|----------------------------------------------------------------------------|------------------------------------------------------------------------------------------------|-----------------------------------------------------------------------------------|----------------------------------------------------------------------------------------------|----------------------------------------------------------------------------|-----------------------------------------------------------------------------------|
| P1–P2 / P1C–P1C <sup>i</sup> / P1F–P1F <sup>ii</sup>                                 | 2.1824(9)                                                                  | 2.1795(10)                                                                                     | 2.1730(15)                                                                        | 2.1842(12)                                                                                   | 2.1812(9)                                                                  | 2.1723(12)                                                                        |
| P1–O1                                                                                | 1.4978(17)                                                                 | 1.485(2)                                                                                       | 1.499(2)                                                                          | 1.4989(17)                                                                                   | 1.4854(16)                                                                 | 1.498(2)                                                                          |
| P1–O2                                                                                | 1.5389(17)                                                                 | 1.5423(17)                                                                                     | 1.541(2)                                                                          | 1.531(2)                                                                                     | 1.5368(16)                                                                 | 1.5145(18)                                                                        |
| P1–O3                                                                                | 1.5523(17)                                                                 | 1.565(2)                                                                                       | 1.542(2)                                                                          | 1.5475(17)                                                                                   | 1.5578(16)                                                                 | 1.5594(16)                                                                        |
| P2–O4                                                                                | 1.4946(16)                                                                 | 1.492(3)                                                                                       | –                                                                                 | 1.495(2)                                                                                     | 1.4947(17)                                                                 | –                                                                                 |
| P2–O5                                                                                | 1.5051(15)                                                                 | 1.5149(18)                                                                                     | –                                                                                 | 1.5129(17)                                                                                   | 1.5212(16)                                                                 | –                                                                                 |
| P2–O6                                                                                | 1.5648(16)                                                                 | 1.545(2)                                                                                       | –                                                                                 | 1.5670(17)                                                                                   | 1.5449(17)                                                                 | –                                                                                 |
| O1–P1–O2                                                                             | 114.23(10)                                                                 | 111.62(12)                                                                                     | 113.60(13)                                                                        | 114.73(13)                                                                                   | 111.20(9)                                                                  | 112.95(12)                                                                        |
| O1–P1–O3                                                                             | 113.93(10)                                                                 | 109.84(12)                                                                                     | 111.29(17)                                                                        | 114.11(10)                                                                                   | 110.38(9)                                                                  | 113.72(12)                                                                        |
| O2–P1–O3                                                                             | 103.21(9)                                                                  | 109.34(11)                                                                                     | 108.36(16)                                                                        | 102.76(11)                                                                                   | 110.30(9)                                                                  | 107.08(12)                                                                        |
| O1–P1–P2/P1C <sup>i</sup> /P1F <sup>ii</sup>                                         | 106.84(7)                                                                  | 111.22(9)                                                                                      | 107.79(12)                                                                        | 106.99(8)                                                                                    | 109.51(7)                                                                  | 108.79(11)                                                                        |
| O2–P1–P2/P1C <sup>i</sup> /P1F <sup>ii</sup>                                         | 108.55(7)                                                                  | 107.81(8)                                                                                      | 107.17(11)                                                                        | 108.14(9)                                                                                    | 107.48(7)                                                                  | 108.18(9)                                                                         |
| O3–P1–P2/P1C <sup>i</sup> /P1F <sup>ii</sup>                                         | 109.99(7)                                                                  | 106.86(9)                                                                                      | 108.44(11)                                                                        | 109.96(9)                                                                                    | 107.86(6)                                                                  | 105.75(7)                                                                         |
| O4–P2–O5                                                                             | 117.51(9)                                                                  | 114.53(12)                                                                                     | –                                                                                 | 117.59(11)                                                                                   | 113.35(10)                                                                 | –                                                                                 |
| O4–P2–O6                                                                             | 107.64(9)                                                                  | 109.10(14)                                                                                     | –                                                                                 | 107.88(12)                                                                                   | 109.19(10)                                                                 | –                                                                                 |
| O5–P2–O6                                                                             | 111.52(9)                                                                  | 111.68(13)                                                                                     | –                                                                                 | 111.46(10)                                                                                   | 112.01(9)                                                                  | –                                                                                 |
| O4–P2–P1                                                                             | 105.69(6)                                                                  | 109.55(9)                                                                                      | –                                                                                 | 106.71(7)                                                                                    | 111.10(7)                                                                  | –                                                                                 |
| O5–P2–P1                                                                             | 107.00(6)                                                                  | 107.03(8)                                                                                      | –                                                                                 | 105.27(8)                                                                                    | 105.34(7)                                                                  | –                                                                                 |
| O6–P2–P1                                                                             | 106.85(6)                                                                  | 104.42(10)                                                                                     | –                                                                                 | 107.36(9)                                                                                    | 105.54(7)                                                                  | –                                                                                 |
| O1–P1–P2/P1C <sup>i</sup> /P1F <sup>ii</sup> –O4/O1C <sup>i</sup> /O1F <sup>ii</sup> | –70.87(10)                                                                 | 178.64(15)                                                                                     | 180                                                                               | 67.75(12)                                                                                    | 169.12(10)                                                                 | 180                                                                               |
| O2–P1–P2/P1C <sup>i</sup> /P1F <sup>ii</sup> –O4/O1C <sup>i</sup> /O1F <sup>ii</sup> | 52.77(10)                                                                  | 55.96(14)                                                                                      | 57.37(15)                                                                         | –56.34(13)                                                                                   | –69.96(10)                                                                 | –56.96(15)                                                                        |
| O3–P1–P2/P1C <sup>i</sup> /P1F <sup>ii</sup> –O4/O1C <sup>i</sup> /O1F <sup>ii</sup> | 165.01(10)                                                                 | –61.48(14)                                                                                     | –59.4(2)                                                                          | –167.82(11)                                                                                  | 48.97(10)                                                                  | 57.48(13)                                                                         |
| O1–P1–P2/P1C <sup>i</sup> /P1F <sup>ii</sup> –O5/O2C <sup>i</sup> /O2F <sup>ii</sup> | 55.12(10)                                                                  | –56.64(14)                                                                                     | –57.37(15)                                                                        | –57.93(11)                                                                                   | –67.77(10)                                                                 | 56.96(15)                                                                         |
| O2–P1–P2/P1C <sup>i</sup> /P1F <sup>ii</sup> –O5/O2C <sup>i</sup> /O2F <sup>ii</sup> | 178.76(9)                                                                  | –179.31(10)                                                                                    | 180                                                                               | 177.98(11)                                                                                   | 53.16(10)                                                                  | 180                                                                               |
| O3–P1–P2/P1C <sup>i</sup> /P1F <sup>ii</sup> –O5/O2C <sup>i</sup> /O2F <sup>ii</sup> | –69.00(10)                                                                 | 63.24(11)                                                                                      | 63.22(17)                                                                         | 66.50(10)                                                                                    | 172.08(9)                                                                  | –65.56(13)                                                                        |
| O1–P1–P2/P1C <sup>i</sup> /P1F <sup>ii</sup> –O6/O3C <sup>i</sup> /O3F <sup>ii</sup> | 174.69(9)                                                                  | –                                                                                              | 59.4(2)                                                                           | –176.80(11)                                                                                  | 50.90(10)                                                                  | –57.48(13)                                                                        |
| O2–P1–P2/P1C <sup>i</sup> /P1F <sup>ii</sup> –O6/O3C <sup>i</sup> /O3F <sup>ii</sup> | –61.68(10)                                                                 | –                                                                                              | –63.22(17)                                                                        | 59.11(13)                                                                                    | 171.82(9)                                                                  | 65.56(13)                                                                         |
| O3–P1–P2/P1C <sup>i</sup> /P1F <sup>ii</sup> –O6/O3C <sup>i</sup> /O3F <sup>ii</sup> | 50.56(10)                                                                  | –                                                                                              | 180                                                                               | –52.37(11)                                                                                   | –69.26(10)                                                                 | 180                                                                               |

Symmetry codes: (i)  $-x+1, -y+1, -z+1$ ; (ii)  $-x, -y+1, -z$ .

**Table S5.** Selected geometric parameters (Å, °) for [(Bu<sub>4</sub>N)(H<sub>3</sub>P<sub>2</sub>O<sub>6</sub>)]·0.25(H<sub>4</sub>P<sub>2</sub>O<sub>6</sub>) (**5**). H<sub>4</sub>P<sub>2</sub>O<sub>6</sub> molecules are marked in pink.

|                                                | 5-A<br>(H <sub>4</sub> P <sub>2</sub> O <sub>6</sub> )<br>SOF =0.963(2) | 5-B<br>(H <sub>3</sub> P <sub>2</sub> O <sub>6</sub> <sup>-</sup> ) | 5-C<br>(H <sub>3</sub> P <sub>2</sub> O <sub>6</sub> <sup>-</sup> ) |
|------------------------------------------------|-------------------------------------------------------------------------|---------------------------------------------------------------------|---------------------------------------------------------------------|
| P1–P2 / P1A–P1A <sup>i</sup>                   | 2.1872(12)                                                              | 2.1847(8)                                                           | 2.2211(9)                                                           |
| P1–O1                                          | 1.4950(17)                                                              | 1.4916(14)                                                          | 1.4943(15)                                                          |
| P1–O2                                          | 1.5385(15)                                                              | 1.5420(15)                                                          | 1.5269(16)                                                          |
| P1–O3                                          | 1.551(2)                                                                | 1.5582(14)                                                          | 1.5745(16)                                                          |
| P2–O4                                          | –                                                                       | 1.5106(14)                                                          | 1.5039(15)                                                          |
| P2–O5                                          | –                                                                       | 1.5109(15)                                                          | 1.5202(16)                                                          |
| P2–O6                                          | –                                                                       | 1.5635(15)                                                          | 1.5726(17)                                                          |
| O1–P1–O2                                       | 111.53(9)                                                               | 112.28(8)                                                           | 116.59(9)                                                           |
| O1–P1–O3                                       | 110.04(10)                                                              | 109.85(8)                                                           | 113.67(9)                                                           |
| O2–P1–O3                                       | 111.76(11)                                                              | 110.26(8)                                                           | 103.38(9)                                                           |
| O1–P1–P2/P1A <sup>i</sup>                      | 110.40(10)                                                              | 108.49(6)                                                           | 107.50(6)                                                           |
| O2–P1–P2/P1A <sup>i</sup>                      | 106.59(7)                                                               | 108.05(6)                                                           | 109.18(7)                                                           |
| O3–P1–P2/P1A <sup>i</sup>                      | 106.34(11)                                                              | 107.78(6)                                                           | 105.99(7)                                                           |
| O4–P2–O5                                       | –                                                                       | 114.29(8)                                                           | 115.60(9)                                                           |
| O4–P2–O6                                       | –                                                                       | 112.62(8)                                                           | 112.57(9)                                                           |
| O5–P2–O6                                       | –                                                                       | 108.21(8)                                                           | 104.19(9)                                                           |
| O4–P2–P1                                       | –                                                                       | 107.46(6)                                                           | 107.14(7)                                                           |
| O5–P2–P1                                       | –                                                                       | 109.43(6)                                                           | 110.46(7)                                                           |
| O6–P2–P1                                       | –                                                                       | 104.32(6)                                                           | 106.57(7)                                                           |
| O1–P1–P2/P1A <sup>i</sup> –O4/O1A <sup>i</sup> | 180                                                                     | 59.43(9)                                                            | 0.93(9)                                                             |
| O2–P1–P2/P1A <sup>i</sup> –O4/O1A <sup>i</sup> | 58.71(11)                                                               | –62.53(9)                                                           | –126.42(9)                                                          |
| O3–P1–P2/P1A <sup>i</sup> –O4/O1A <sup>i</sup> | –60.65(12)                                                              | 178.33(8)                                                           | 122.82(9)                                                           |
| O1–P1–P2/P1A <sup>i</sup> –O5/O2A <sup>i</sup> | –58.71(11)                                                              | –175.94(8)                                                          | 127.63(9)                                                           |
| O2–P1–P2/P1A <sup>i</sup> –O5/O2A <sup>i</sup> | 180                                                                     | 62.10(9)                                                            | 0.29(10)                                                            |
| O3–P1–P2/P1A <sup>i</sup> –O5/O2A <sup>i</sup> | 60.63(13)                                                               | –57.04(9)                                                           | –110.48(9)                                                          |
| O1–P1–P2/P1A <sup>i</sup> –O6/O3A <sup>i</sup> | 60.65(12)                                                               | –60.34(9)                                                           | –119.78(9)                                                          |
| O2–P1–P2/P1A <sup>i</sup> –O6/O3A <sup>i</sup> | –60.63(13)                                                              | 177.70(8)                                                           | 112.87(9)                                                           |
| O3–P1–P2/P1A <sup>i</sup> –O6/O3A <sup>i</sup> | 180                                                                     | 58.56(8)                                                            | 2.10(9)                                                             |

Symmetrycode: (i)  $-x+1, -y+1, -z+1$ .

**Table S6.** Selected geometric parameters (Å, °) for [(Et<sub>4</sub>N)Cl]·0.5H<sub>4</sub>P<sub>2</sub>O<sub>6</sub>·3H<sub>2</sub>O (**6**). H<sub>4</sub>P<sub>2</sub>O<sub>6</sub> molecule is marked in pink.

|                                        | (H <sub>4</sub> P <sub>2</sub> O <sub>6</sub> ) |
|----------------------------------------|-------------------------------------------------|
| P1–P1 <sup>i</sup>                     | 2.1863(12)                                      |
| P1–O1                                  | 1.4841(16)                                      |
| P1–O2                                  | 1.5512(16)                                      |
| P1–O3                                  | 1.5524(16)                                      |
| O1–P1–O2                               | 115.27(9)                                       |
| O1–P1–O3                               | 115.60(9)                                       |
| O2–P1–O3                               | 103.03(9)                                       |
| O1–P1–P1 <sup>i</sup>                  | 111.69(7)                                       |
| O2–P1–P1 <sup>i</sup>                  | 105.67(7)                                       |
| O3–P1–P1 <sup>i</sup>                  | 104.45(7)                                       |
| O1–P1–P1 <sup>i</sup> –O1 <sup>i</sup> | 180                                             |
| O2–P1–P1 <sup>i</sup> –O1 <sup>i</sup> | 53.94 (10)                                      |
| O3–P1–P1 <sup>i</sup> –O1 <sup>i</sup> | –54.36 (10)                                     |
| O1–P1–P1 <sup>i</sup> –O2 <sup>i</sup> | –53.94 (10)                                     |
| O2–P1–P1 <sup>i</sup> –O2 <sup>i</sup> | 180                                             |
| O3–P1–P1 <sup>i</sup> –O2 <sup>i</sup> | 71.69 (9)                                       |
| O1–P1–P1 <sup>i</sup> –O3 <sup>i</sup> | 54.36 (10)                                      |
| O2–P1–P1 <sup>i</sup> –O3 <sup>i</sup> | –71.69 (9)                                      |
| O3–P1–P1 <sup>i</sup> –O3 <sup>i</sup> | 180                                             |

Symmetry code: (i)  $-x+1, -y+1, -z+1$ .

**Table S7.** Hydrogen-bond geometry (Å, °) for [(Et<sub>4</sub>N)(H<sub>3</sub>P<sub>2</sub>O<sub>6</sub>)]·0.5H<sub>4</sub>P<sub>2</sub>O<sub>6</sub>·2H<sub>2</sub>O (**1**). Interactions within AEHB anion cluster are marked in blue.

| <i>D—H···A</i>                 | <i>D—H</i> | <i>H···A</i> | <i>D···A</i> | <i>D—H···A</i> |
|--------------------------------|------------|--------------|--------------|----------------|
| O2A—H2A···O5B                  | 0.84       | 1.71         | 2.4869(16)   | 154            |
| O3A—H3A···O4F <sup>i</sup>     | 0.84       | 1.77         | 2.5355(16)   | 151            |
| O6A—H6A···O1W                  | 0.84       | 1.73         | 2.5661(17)   | 174            |
| O2B—H2B···O5A                  | 0.84       | 1.71         | 2.4669(16)   | 150            |
| O3B—H3B···O1C                  | 0.84       | 1.76         | 2.5266(16)   | 151            |
| O6B—H6B···O2W                  | 0.84       | 1.74         | 2.5804(16)   | 174            |
| O2C—H2C···O3W                  | 0.84       | 1.67         | 2.4870(17)   | 163            |
| O3C—H3C···O4D                  | 0.84       | 1.71         | 2.5379(17)   | 168            |
| O5C—H5C···O4W                  | 0.84       | 1.68         | 2.4855(17)   | 160            |
| O6C—H6C···O4B                  | 0.84       | 1.71         | 2.5362(17)   | 169            |
| O2D—H2D···O5E                  | 0.84       | 1.71         | 2.4670(16)   | 150            |
| O3D—H3D···O4C                  | 0.84       | 1.76         | 2.5238(16)   | 151            |
| O6D—H6D···O5W                  | 0.84       | 1.74         | 2.5782(16)   | 174            |
| O2E—H2E···O5D                  | 0.84       | 1.71         | 2.4902(16)   | 154            |
| O3E—H3E···O1F                  | 0.84       | 1.77         | 2.5324(16)   | 150            |
| O6E—H6E···O6W                  | 0.84       | 1.73         | 2.5628(17)   | 174            |
| O2F—H2F···O7W                  | 0.84       | 1.67         | 2.4941(17)   | 166            |
| O3F—H3F···O4A <sup>ii</sup>    | 0.84       | 1.69         | 2.5186(17)   | 169            |
| O5F—H5F···O8W                  | 0.84       | 1.67         | 2.4921(17)   | 167            |
| O6F—H6F···O4E                  | 0.84       | 1.69         | 2.5198(17)   | 168            |
| O2G—H2G···O5G <sup>iii</sup>   | 0.84       | 1.70         | 2.4702(16)   | 152            |
| O3G—H3G···O4H                  | 0.84       | 1.76         | 2.5370(16)   | 152            |
| O6G—H6G···O9W                  | 0.84       | 1.74         | 2.5762(17)   | 173            |
| O2H—H2H···O11W                 | 0.84       | 1.68         | 2.4920(17)   | 161            |
| O3H—H3H···O4G                  | 0.84       | 1.69         | 2.5262(16)   | 170            |
| O5H—H5H···O10W                 | 0.84       | 1.67         | 2.4908(17)   | 165            |
| O6H—H6H···O4I                  | 0.84       | 1.71         | 2.5324(16)   | 164            |
| O2I—H2I···O5I <sup>iv</sup>    | 0.84       | 1.72         | 2.4882(16)   | 152            |
| O3I—H3I···O1H                  | 0.84       | 1.77         | 2.5278(16)   | 149            |
| O6I—H6I···O12W                 | 0.84       | 1.73         | 2.5656(17)   | 174            |
| O1W—H1W···O5B <sup>v</sup>     | 0.84       | 1.93         | 2.7659(17)   | 178            |
| O1W—H2W···O1B                  | 0.84       | 1.92         | 2.7526(17)   | 172            |
| O2W—H3W···O5A <sup>vi</sup>    | 0.84       | 1.92         | 2.7589(17)   | 177            |
| O2W—H4W···O1A                  | 0.84       | 1.95         | 2.7880(16)   | 175            |
| O3W—H5W···O1B                  | 0.84       | 1.90         | 2.7357(17)   | 177            |
| O3W—H6W···O4B <sup>v</sup>     | 0.84       | 1.91         | 2.7351(18)   | 168            |
| O4W—H7W···O1D                  | 0.84       | 1.89         | 2.7338(17)   | 177            |
| O4W—H8W···O4D <sup>vi</sup>    | 0.84       | 1.91         | 2.7419(17)   | 172            |
| O5W—H9W···O5E <sup>v</sup>     | 0.84       | 1.92         | 2.7611(17)   | 179            |
| O5W—H10W···O1E                 | 0.84       | 1.95         | 2.7852(17)   | 174            |
| O6W—H11W···O5D <sup>vi</sup>   | 0.84       | 1.92         | 2.7645(18)   | 179            |
| O6W—H12W···O1D                 | 0.84       | 1.91         | 2.7492(17)   | 173            |
| O7W—H13W···O1E                 | 0.84       | 1.90         | 2.7418(17)   | 176            |
| O7W—H14W···O4E <sup>v</sup>    | 0.84       | 1.92         | 2.7394(18)   | 165            |
| O8W—H15W···O1A <sup>ii</sup>   | 0.84       | 1.90         | 2.7387(17)   | 176            |
| O8W—H16W···O4A <sup>vii</sup>  | 0.84       | 1.91         | 2.7401(18)   | 169            |
| O9W—H17W···O5G <sup>viii</sup> | 0.84       | 1.93         | 2.7691(17)   | 177            |
| O9W—H18W···O1G <sup>iii</sup>  | 0.84       | 1.93         | 2.7718(17)   | 175            |
| O10W—H19W···O4G <sup>v</sup>   | 0.84       | 1.91         | 2.7394(17)   | 171            |
| O10W—H20W···O1G                | 0.84       | 1.90         | 2.7403(17)   | 178            |
| O11W—H21W···O1I                | 0.84       | 1.90         | 2.7394(17)   | 179            |



|                               |      |      |            |     |
|-------------------------------|------|------|------------|-----|
| O11W—H22W...O4I <sup>vi</sup> | 0.84 | 1.91 | 2.7379(17) | 167 |
| O12W—H23W...O5I <sup>ix</sup> | 0.84 | 1.92 | 2.7561(18) | 176 |
| O12W—H24W...O1I <sup>iv</sup> | 0.84 | 1.92 | 2.7555(17) | 171 |
| C1A—H1A2...O6G                | 0.99 | 2.58 | 3.5107(19) | 157 |
| C2A—H2A3...O1W <sup>vi</sup>  | 0.98 | 2.61 | 3.574(2)   | 168 |
| C5A—H5A1...O5B                | 0.99 | 2.48 | 3.3820(18) | 152 |
| C7A—H7A1...O2A                | 0.99 | 2.41 | 3.3712(18) | 164 |
| C8A—H8A3...O4H                | 0.98 | 2.54 | 3.506(2)   | 167 |
| C3B—H3B1...O6D                | 0.99 | 2.52 | 3.4536(19) | 157 |
| C3B—H3B2...O3D <sup>v</sup>   | 0.99 | 2.61 | 3.284(2)   | 125 |
| C4B—H4B1...O12W <sup>ix</sup> | 0.98 | 2.59 | 3.552(2)   | 167 |
| C5B—H5B2...O5I                | 0.99 | 2.45 | 3.3496(18) | 151 |
| C7B—H7B1...O2I <sup>v</sup>   | 0.99 | 2.48 | 3.4367(18) | 162 |
| C8B—H8B1...O4C                | 0.98 | 2.57 | 3.538(2)   | 168 |
| C1C—H1C1...O6I <sup>iv</sup>  | 0.99 | 2.40 | 3.246(2)   | 143 |
| C1C—H1C2...O1H <sup>iv</sup>  | 0.99 | 2.42 | 3.3556(19) | 158 |
| C2C—H2C1...O5W                | 0.98 | 2.58 | 3.542(2)   | 166 |
| C7C—H7C1...O1E                | 0.99 | 2.61 | 3.2947(19) | 127 |
| C3D—H3D1...O4F                | 0.99 | 2.39 | 3.3368(19) | 161 |
| C3D—H3D2...O6A <sup>ii</sup>  | 0.99 | 2.45 | 3.2863(19) | 142 |
| C5D—H5D1...O2G <sup>ii</sup>  | 0.99 | 2.54 | 3.5161(19) | 171 |
| C7D—H7D1...O1G <sup>iv</sup>  | 0.99 | 2.61 | 3.3146(19) | 128 |
| C3E—H3E1...O1F <sup>x</sup>   | 0.99 | 2.39 | 3.3370(19) | 160 |
| C3E—H3E2...O6E <sup>x</sup>   | 0.99 | 2.43 | 3.2715(19) | 142 |
| C4E—H4E3...O2W                | 0.98 | 2.59 | 3.554(2)   | 168 |
| C5E—H5E2...O2B                | 0.99 | 2.59 | 3.5702(19) | 171 |
| C7E—H7E2...O1A                | 0.99 | 2.61 | 3.2979(19) | 127 |
| C1F—H1F2...O6B                | 0.99 | 2.54 | 3.4751(19) | 157 |
| C2F—H2F3...O6W <sup>xi</sup>  | 0.98 | 2.61 | 3.568(2)   | 167 |
| C5F—H5F1...O5D <sup>x</sup>   | 0.99 | 2.48 | 3.3840(18) | 151 |
| C7F—H7F2...O2E <sup>x</sup>   | 0.99 | 2.43 | 3.3867(18) | 163 |
| C8F—H8F3...O1C                | 0.98 | 2.56 | 3.522(2)   | 167 |

Symmetrycodes: (i)  $x, y-1, z$ ; (ii)  $x, y+1, z$ ; (iii)  $-x, -y, -z+1$ ; (iv)  $-x, -y+1, -z+1$ ; (v)  $x-1, y, z$ ; (vi)  $x+1, y, z$ ; (vii)  $x+1, y+1, z$ ; (viii)  $-x+1, -y, -z+1$ ; (ix)  $-x-1, -y+1, -z+1$ ; (x)  $-x+1, -y+1, -z$ ; (xi)  $-x+2, -y+1, -z$ .

**Table S8.** Hydrogen-bond geometry (Å, °) for [(Et<sub>4</sub>N)<sub>2</sub>(H<sub>2</sub>P<sub>2</sub>O<sub>6</sub>)]·H<sub>4</sub>P<sub>2</sub>O<sub>6</sub> (**2**)

| <i>D</i> —H··· <i>A</i>                                | <i>D</i> —H | H··· <i>A</i> | <i>D</i> ··· <i>A</i> | <i>D</i> —H··· <i>A</i> |
|--------------------------------------------------------|-------------|---------------|-----------------------|-------------------------|
| O2 <i>A</i> —H2 <i>A</i> ···O2 <i>B</i> <sup>ii</sup>  | 0.84        | 1.64          | 2.4754(18)            | 173                     |
| O3 <i>A</i> —H3 <i>A</i> ···O1 <i>B</i>                | 0.84        | 1.63          | 2.4631(15)            | 172                     |
| O3 <i>B</i> —H3 <i>B</i> ···O1 <i>A</i> <sup>iii</sup> | 0.84        | 1.71          | 2.5483(15)            | 172                     |
| C1—H12···O2 <i>B</i> <sup>ii</sup>                     | 0.99        | 2.45          | 3.263(2)              | 140                     |
| C3—H32···O1 <i>A</i> <sup>iv</sup>                     | 0.99        | 2.58          | 3.294(2)              | 129                     |
| C6—H61···O1 <i>A</i> <sup>iv</sup>                     | 0.98        | 2.55          | 3.527(3)              | 175                     |
| C8—H83···O1 <i>A</i> <sup>v</sup>                      | 0.98        | 2.60          | 3.571(2)              | 172                     |

Symmetrycodes: (ii)  $-x+1, -y+1, -z+1$ ; (iii)  $x, y+1, z$ ; (iv)  $x, y+1, z-1$ ; (v)  $-x, -y+1, -z+1$ .

**Table S9.** Hydrogen-bond geometry (Å, °) for [(Bu<sub>4</sub>N)(H<sub>3</sub>P<sub>2</sub>O<sub>6</sub>)]·0.75H<sub>4</sub>P<sub>2</sub>O<sub>6</sub> (**3**). Interactions within AEHB anion cluster are marked in blue.

| <i>D</i> —H··· <i>A</i>                                 | <i>D</i> —H | H··· <i>A</i> | <i>D</i> ··· <i>A</i> | <i>D</i> —H··· <i>A</i> |
|---------------------------------------------------------|-------------|---------------|-----------------------|-------------------------|
| O2 <i>A</i> —H2 <i>A</i> ···O5 <i>B</i> <sup>ii</sup>   | 0.84        | 1.74          | 2.570(3)              | 168                     |
| O3 <i>A</i> —H3 <i>A</i> ···O4 <i>C</i> <sup>ii</sup>   | 0.84        | 1.73          | 2.545(3)              | 164                     |
| O5 <i>A</i> —H5 <i>A</i> ···O5 <i>C</i> <sup>ii</sup>   | 0.84        | 1.67          | 2.511(3)              | 176                     |
| O6 <i>A</i> —H6 <i>A</i> ···O5 <i>B</i>                 | 0.84        | 1.69          | 2.530(3)              | 174                     |
| O2 <i>B</i> —H2 <i>B</i> ···O4 <i>A</i>                 | 0.84        | 1.72          | 2.541(3)              | 164                     |
| O3 <i>B</i> —H3 <i>B</i> ···O4 <i>C</i>                 | 0.84        | 1.77          | 2.606(3)              | 177                     |
| O6 <i>B</i> —H6 <i>B</i> ···O1 <i>A</i>                 | 0.84        | 1.71          | 2.548(3)              | 173                     |
| O2 <i>C</i> —H2 <i>C</i> ···O4 <i>B</i>                 | 0.84        | 1.63          | 2.459(3)              | 169                     |
| O3 <i>C</i> —H3 <i>C</i> ···O1 <i>B</i>                 | 0.84        | 1.73          | 2.540(3)              | 162                     |
| O6 <i>C</i> —H6 <i>C</i> ···O1 <i>D</i> <sup>i</sup>    | 0.84        | 1.71          | 2.552(5)              | 175                     |
| O6 <i>C</i> —H6 <i>C</i> ···O1 <i>X</i> <sup>†</sup>    | 0.84        | 1.50          | 2.33(2)               | 169                     |
| O2 <i>D</i> —H2 <i>D</i> ···O1 <i>C</i>                 | 0.84        | 1.68          | 2.491(5)              | 161                     |
| O2 <i>X</i> —H2 <i>X</i> ···O1 <i>C</i>                 | 0.84        | 1.68          | 2.52(3)               | 175                     |
| O3 <i>D</i> —H3 <i>D</i> ···O5 <i>C</i>                 | 0.84        | 1.77          | 2.603(3)              | 171                     |
| C1 <i>A</i> —H1 <i>A</i> 2···O3 <i>B</i> <sup>iii</sup> | 0.99        | 2.60          | 3.363(4)              | 134                     |
| C9 <i>A</i> —H9 <i>A</i> 2···O4 <i>A</i> <sup>iv</sup>  | 0.99        | 2.47          | 3.408(4)              | 158                     |
| C1 <i>B</i> —H1 <i>B</i> 2···O1 <i>C</i>                | 0.99        | 2.34          | 3.161(4)              | 140                     |
| C5 <i>B</i> —H5 <i>B</i> 2···O1 <i>D</i> <sup>i</sup>   | 0.99        | 2.60          | 3.334(5)              | 132                     |
| C9 <i>B</i> —H9 <i>B</i> 1···O1 <i>A</i> <sup>v</sup>   | 0.99        | 2.38          | 3.271(4)              | 149                     |

Symmetrycodes: (i)  $-x+1, -y+1, -z+1$ ; (ii)  $-x+3/2, y-1/2, -z+3/2$ ; (iii)  $x+1, y, z$ ; (iv)  $-x+3/2, y+1/2, -z+3/2$ ; (v)  $-x+1, -y, -z+1$ .

**Table S10.** Hydrogen-bond geometry (Å, °) for [(Bu<sub>4</sub>N)(H<sub>3</sub>P<sub>2</sub>O<sub>6</sub>)]·0.25(H<sub>4</sub>P<sub>2</sub>O<sub>6</sub>)·0.52H<sub>2</sub>O (**4**). Interactions within AEHB anion cluster are marked in blue.

| <i>D—H···A</i>                | <i>D—H</i> | <i>H···A</i> | <i>D···A</i> | <i>D—H···A</i> |
|-------------------------------|------------|--------------|--------------|----------------|
| O2A—H2A···O4B                 | 0.84       | 1.59         | 2.428(3)     | 172            |
| O2A—H2A···O1X                 | 0.84       | 1.86         | 2.696(10)    | 178            |
| O3A—H3A···O5A <sup>iii</sup>  | 0.84       | 1.70         | 2.521(2)     | 167            |
| O6A—H6A···O1W                 | 0.84       | 1.75         | 2.580(2)     | 171            |
| O2B—H2B···O4A                 | 0.84       | 1.68         | 2.469(2)     | 155            |
| O3B—H3B···O1A                 | 0.84       | 1.73         | 2.535(3)     | 161            |
| O6B—H6B···O1C                 | 0.84       | 1.68         | 2.511(4)     | 167            |
| O2X—H2X···O4A                 | 0.84       | 1.76         | 2.480(9)     | 143            |
| O3X—H3X···O1Y                 | 0.84       | 1.87         | 2.502(14)    | 131            |
| O6X—H6X···O1A                 | 0.84       | 2.22         | 2.861(8)     | 133            |
| O2C—H2C···O1B                 | 0.84       | 1.73         | 2.545(3)     | 162            |
| O3C—H3C···O5B <sup>i</sup>    | 0.84       | 1.70         | 2.432(3)     | 145            |
| O3Y—H3Y···O5X <sup>i</sup>    | 0.84       | 1.82         | 2.572(15)    | 148            |
| O2D—H2D···O4E                 | 0.84       | 1.59         | 2.399(3)     | 160            |
| O3D—H3D···O5D <sup>iv</sup>   | 0.84       | 1.71         | 2.494(2)     | 155            |
| O6D—H6D···O2W                 | 0.84       | 1.77         | 2.601(3)     | 170            |
| O2Z—H2Z···O4E                 | 0.84       | 2.01         | 2.754(13)    | 147            |
| O6Z—H6Z···O2W                 | 0.84       | 2.16         | 2.992(16)    | 169            |
| O2E—H2E···O4D                 | 0.84       | 1.64         | 2.461(2)     | 167            |
| O2E—H2E···O4Z                 | 0.84       | 1.56         | 2.345(13)    | 154            |
| O3E—H3E···O1D                 | 0.84       | 1.71         | 2.545(2)     | 172            |
| O3E—H3E···O1Z                 | 0.84       | 1.94         | 2.775(11)    | 172            |
| O6E—H6E···O1F                 | 0.84       | 1.67         | 2.512(3)     | 178            |
| O6E—H6E···O1Q                 | 0.84       | 1.67         | 2.494(16)    | 168            |
| O2F—H2FE···O5E <sup>ii</sup>  | 1.07(3)    | 1.37(3)      | 2.420(2)     | 164(2)         |
| O3F—H3F···O1E                 | 0.84       | 1.74         | 2.542(2)     | 160            |
| O2Q—H2QE···O5E <sup>ii</sup>  | 1.23(3)    | 1.37(3)      | 2.53(2)      | 153(2)         |
| O3Q—H3Q···O1E <sup>ii</sup>   | 0.84       | 1.61         | 2.394(16)    | 155            |
| O1W—H1W···O5A <sup>iii</sup>  | 0.84       | 1.99         | 2.775(2)     | 156            |
| O1W—H2W···O1A <sup>iii</sup>  | 0.84       | 2.03         | 2.781(2)     | 149            |
| O2W—H3W···O5D <sup>iv</sup>   | 0.84       | 1.94         | 2.761(2)     | 164            |
| O2W—H3W···O3Z                 | 0.84       | 2.18         | 2.827(12)    | 133            |
| O2W—H3W···O5Z <sup>iv</sup>   | 0.84       | 2.58         | 3.387(12)    | 163            |
| O2W—H4W···O1D <sup>iv</sup>   | 0.84       | 2.12         | 2.837(3)     | 144            |
| O2W—H4W···O1Z <sup>v</sup>    | 0.84       | 1.86         | 2.501(14)    | 132            |
| C1A—H1A2···O2B                | 0.99       | 2.51         | 3.377(3)     | 146            |
| C2A—H2A1···O5E <sup>v</sup>   | 0.99       | 2.51         | 3.454(3)     | 159            |
| C2A—H2A2···O3Q <sup>v</sup>   | 0.99       | 2.48         | 3.394(19)    | 154            |
| C5A—H5A1···O2B                | 0.99       | 2.56         | 3.425(3)     | 146            |
| C9A—H9A1···O5E <sup>v</sup>   | 0.99       | 2.39         | 3.271(3)     | 148            |
| C13A—H13A···O3F <sup>vi</sup> | 0.99       | 2.55         | 3.509(3)     | 162            |
| C1B—H1B2···O2C                | 0.99       | 2.34         | 3.284(3)     | 159            |
| C5B—H5B1···O6B <sup>i</sup>   | 0.99       | 2.50         | 3.392(3)     | 149            |
| C5B—H5B1···O3X <sup>i</sup>   | 0.99       | 2.37         | 3.212(6)     | 142            |
| C5B—H5B2···O1C <sup>i</sup>   | 0.99       | 2.57         | 3.210(3)     | 122            |
| C8B—H8B3···O1C <sup>i</sup>   | 0.98       | 2.57         | 3.526(5)     | 164            |
| C9B—H9B1···O1D                | 0.99       | 2.50         | 3.385(3)     | 148            |
| C10B—H10C···O3W <sup>i</sup>  | 0.99       | 2.58         | 3.434(15)    | 144            |
| C15B—H15C···O1F               | 0.99       | 2.60         | 3.322(3)     | 130            |
| C1C—H1C1···O3W <sup>i</sup>   | 0.99       | 2.47         | 3.204(15)    | 131            |
| C1C—H1C2···O3B                | 0.99       | 2.43         | 3.256(3)     | 140            |

|                                    |      |      |           |     |
|------------------------------------|------|------|-----------|-----|
| <i>C5C—H5C1…O5B</i>                | 0.99 | 2.36 | 3.267(3)  | 151 |
| <i>C9C—H9C2…O2D<sup>vii</sup></i>  | 0.99 | 2.54 | 3.368(3)  | 141 |
| <i>C9C—H9C2…O2Z<sup>ii</sup></i>   | 0.99 | 2.40 | 3.275(12) | 147 |
| <i>C11C—H11F…O2D<sup>vii</sup></i> | 0.99 | 2.42 | 3.328(3)  | 153 |
| <i>C1D—H1D2…O2F<sup>i</sup></i>    | 0.99 | 2.41 | 3.231(3)  | 140 |
| <i>C1D—H1D2…O2Q<sup>i</sup></i>    | 0.99 | 2.22 | 3.02(2)   | 137 |
| <i>C5D—H5D1…O2E<sup>viii</sup></i> | 0.99 | 2.54 | 3.511(3)  | 167 |
| <i>C5D—H5D2…O3Q<sup>i</sup></i>    | 0.99 | 2.58 | 3.34(2)   | 134 |
| <i>C9D—H9D1…O6A</i>                | 0.99 | 2.37 | 3.320(3)  | 161 |

Symmetrycodes: (i)  $-x+1, -y+1, -z+1$ ; (ii)  $-x, -y+1, -z$ ; (iii)  $-x+1, -y, -z+2$ ; (iv)  $-x, -y, -z+1$ ; (v)  $x, y, z+1$ ; (vi)  $-x, -y+1, -z+1$ ; (vii)  $-x+1, -y, -z+1$ ; (viii)  $x+1, y, z+1$ .

**Table S11.** Hydrogen-bond geometry (Å, °) for [(Bu<sub>4</sub>N)(H<sub>3</sub>P<sub>2</sub>O<sub>6</sub>)]·0.25(H<sub>4</sub>P<sub>2</sub>O<sub>6</sub>)(**5**). Interactions within AEHB anion cluster are marked in blue.

| <i>D</i> —H··· <i>A</i>                                 | <i>D</i> —H | H··· <i>A</i> | <i>D</i> ··· <i>A</i> | <i>D</i> —H··· <i>A</i> |
|---------------------------------------------------------|-------------|---------------|-----------------------|-------------------------|
| O2 <i>A</i> —H2 <i>A</i> ···O4 <i>B</i>                 | 0.84        | 1.66          | 2.456 (2)             | 157                     |
| O3 <i>A</i> —H3 <i>A</i> ···O1 <i>B</i>                 | 0.84        | 1.76          | 2.539 (3)             | 153                     |
| O2 <i>X</i> —H2 <i>X</i> ···O4 <i>B</i> <sup>i</sup>    | 0.84        | 1.74          | 2.56 (4)              | 165                     |
| O3 <i>X</i> —H3 <i>X</i> ···O1 <i>B</i>                 | 0.84        | 1.66          | 2.36 (6)              | 139                     |
| O2 <i>B</i> —H2 <i>B</i> ···O4 <i>C</i>                 | 0.84        | 1.66          | 2.493 (2)             | 174                     |
| O3 <i>B</i> —H3 <i>B</i> ···O1 <i>C</i>                 | 0.84        | 1.71          | 2.545 (2)             | 174                     |
| O6 <i>B</i> —H6 <i>B</i> ···O1 <i>A</i> <sup>i</sup>    | 0.84        | 1.70          | 2.534 (2)             | 171                     |
| O6 <i>B</i> —H6 <i>B</i> ···O1 <i>X</i> <sup>i</sup>    | 0.84        | 1.65          | 2.49 (4)              | 173                     |
| O2 <i>C</i> —H2 <i>C</i> ···O5 <i>C</i> <sup>ii</sup>   | 0.84        | 1.62          | 2.437 (2)             | 166                     |
| O3 <i>C</i> —H3 <i>C</i> ···O5 <i>B</i>                 | 0.84        | 1.80          | 2.613 (2)             | 162                     |
| O5 <i>C</i> —H5 <i>C</i> ···O2 <i>C</i> <sup>ii</sup>   | 0.84        | 1.62          | 2.437 (2)             | 164                     |
| O6 <i>C</i> —H6 <i>C</i> ···O5 <i>B</i>                 | 0.84        | 1.81          | 2.628 (2)             | 164                     |
| C1 <i>A</i> —H1 <i>AA</i> ···O2 <i>C</i> <sup>ii</sup>  | 0.99        | 2.60          | 3.346 (2)             | 132                     |
| C5 <i>A</i> —H5 <i>AA</i> ···O1 <i>C</i>                | 0.99        | 2.56          | 3.515 (3)             | 161                     |
| C5 <i>A</i> —H5 <i>AB</i> ···O5 <i>C</i> <sup>ii</sup>  | 0.99        | 2.52          | 3.329 (2)             | 139                     |
| C1 <i>B</i> —H1 <i>BA</i> ···O1 <i>B</i>                | 0.99        | 2.47          | 3.308 (2)             | 143                     |
| C1 <i>B</i> —H1 <i>BB</i> ···O2 <i>X</i>                | 0.99        | 2.45          | 3.42 (4)              | 166                     |
| C3 <i>B</i> —H3 <i>BA</i> ···O1 <i>B</i>                | 0.99        | 2.57          | 3.366 (2)             | 137                     |
| C6 <i>B</i> —H6 <i>BB</i> ···O2 <i>X</i> <sup>iii</sup> | 0.99        | 2.50          | 3.12 (5)              | 120                     |
| C13 <i>B</i> —H13 <i>D</i> ···O6 <i>B</i> <sup>iv</sup> | 0.99        | 2.49          | 3.474 (2)             | 175                     |

Symmetrycodes: (i)  $-x+1, -y+1, -z+1$ ; (ii)  $-x+2, -y+1, -z+2$ ; (iii)  $x, -y+3/2, z+1/2$ ; (iv)  $-x+1, y+1/2, -z+3/2$ .

**Table S12.** Hydrogen-bond geometry (Å, °) for [(Et<sub>4</sub>N)Cl]·0.5H<sub>4</sub>P<sub>2</sub>O<sub>6</sub>·3H<sub>2</sub>O (**6**)

| <i>D</i> —H··· <i>A</i>      | <i>D</i> —H | H··· <i>A</i> | <i>D</i> ··· <i>A</i> | <i>D</i> —H··· <i>A</i> |
|------------------------------|-------------|---------------|-----------------------|-------------------------|
| O2—H2···O1W <sup>ii</sup>    | 0.84        | 1.69          | 2.524(2)              | 176                     |
| O3—H3···O2W                  | 0.84        | 1.66          | 2.488(2)              | 170                     |
| O1W—H1W···C11                | 0.84        | 2.31          | 3.151(2)              | 178                     |
| O1W—H2W···O1                 | 0.84        | 1.87          | 2.710(2)              | 177                     |
| O2W—H3W···C11 <sup>iii</sup> | 0.84        | 2.26          | 3.0930(19)            | 172                     |
| O2W—H4W···O3W                | 0.84        | 1.82          | 2.659(3)              | 175                     |
| O3W—H5W···C11                | 0.84        | 2.31          | 3.149(2)              | 174                     |
| O3W—H6W···C11 <sup>iv</sup>  | 0.84        | 2.35          | 3.171(2)              | 167                     |

Symmetrycodes: (ii)  $-x, -y+1, -z+1$ ; (iii)  $x+1, y, z$ ; (iv)  $-x, -y+2, -z$ .

**Table S13.** The assignment of the bands of compounds **2**, **4** and **5** at room temperature. The abbreviations are explained at the foot of the table.

| <b>2</b>  |              | <b>4</b>    |              | <b>5</b>  |              | <b>Assignment</b>               |
|-----------|--------------|-------------|--------------|-----------|--------------|---------------------------------|
| <b>IR</b> | <b>Raman</b> | <b>IR</b>   | <b>Raman</b> | <b>IR</b> | <b>Raman</b> |                                 |
| 3391m     |              | 3392m       |              | 3387m     |              | vH <sub>2</sub> O               |
| 3029m     |              |             |              |           |              |                                 |
| 3019m     | 3019s        |             | 3006sh       |           | 2998sh       | v <sub>as</sub> CH <sub>3</sub> |
| 3000m     | 3001vs       | 2968m2962sh | 2973s        | 2966m     | 2967s        | v <sub>as</sub> CH <sub>2</sub> |
| 2984m     | 2988vs       | 2944m       | 2942sh       | 2960sh    | 2939sh       | vH <sub>2</sub> O               |
| 2959m     |              |             | 2926vs       | 2944m     | 2927vs       |                                 |
| 2920w     | 2955vs       |             |              |           |              | v <sub>s</sub> CH <sub>3</sub>  |
| 2891w     |              | 2876m       | 2872vs       | 2876m     | 2875vs       | v <sub>s</sub> CH <sub>2</sub>  |
|           |              | 2739w       | 2742vw       | 2737w     | 2741vw       | overtone                        |
| 2678m     |              | 2688w       |              | 2685w     |              | vOH...O (A band)                |
| 2289m     |              | 2283m       |              | 2279m     |              | vOH...O (B band)                |
| 1622m     |              | 1634m       |              | 1634m     |              | vOH...O (C band)                |
| 1481m     | 1487w        | 1487m       | 1480m        | 1486m     | 1480m        |                                 |
| 1470m     | 1480sh       | 1466w       | 1469m        | 1466w     | 1469m        | δ <sub>as</sub> CH <sub>3</sub> |
| 1461m     | 1461m        | 1460sh      | 1450m        | 1460sh    | 1450m        |                                 |
|           | 1443m        |             |              |           |              |                                 |
| 1405m     |              | 1426vw      |              | 1424vw    |              | δ <sub>s</sub> CH <sub>2</sub>  |
| 1400m     |              | 1382w       |              | 1381w     |              |                                 |
| 1376w     | 1394vw       | 1365vw      |              | 1366vw    |              |                                 |
| 1367vw    | 1351w        | 1348vw      |              | 1350vw    |              |                                 |
| 1306m     | 1300w        |             | 1322m        |           | 1322m        | ωCH <sub>2</sub> δOH            |
| 1214s     | 1186vw       | 1193sh      | 1149w        | 1196sh    | 1149vw       | τCH <sub>2</sub>                |
| 1194s     | 1147vw       | 1149vs      | 1132w        | 1148vs    | 1131w        | vH <sub>2</sub> O δOH...O       |
| 1186s     | 1122w        | 1112sh      | 1106vw       | 1112sh    |              | vPO                             |
| 1097vs    | 1081w        |             | 1065sh       |           | 1069sh       | vCC                             |
| 1081vs    | 1071m        |             | 1054m        |           | 1054m        | vCN                             |
| 1032s     | 1034w        | 1024s       | 1036w        | 1025s     | 1036sh       | vPO                             |
| 1027sh    |              |             |              |           |              |                                 |
| 1005s     | 1004w        | 987vs       | 1005vw       | 987vs     | 1004vw       | vPO                             |
|           |              |             | 973vw        |           | 969vw        | τH <sub>2</sub> O               |
| 908s      | 896w         | 903s        | 912w 900w    | 906s      | 911w         | vPOρCH <sub>2</sub>             |
|           | 888sh        | 883s        | 880vw        | 889sh     | 880vw        | ρCH <sub>3</sub>                |
| 799s      | 801vw        | 802w        |              | 804w      |              | vCCN                            |
| 789s      | 789vw        |             |              |           |              |                                 |
|           |              | 738m        |              | 739m      |              | vCCCN                           |
|           | 664s         |             | 664w         |           | 656vw        | δPO                             |
|           | 559w         | 517s        |              | 517s      |              |                                 |
| 485s      | 493vw        | 482s        | 486w         | 482s      | 477vw        | δPO                             |
|           |              |             | 466vw        |           |              |                                 |
| 472s 451s | 469w         | 448s        |              | 449s      |              | δPO                             |
|           | 392w 312w    |             | 302w         | 300m      | 297w         | δPO                             |
| 240sh     | 261sh        | 291m 278m   | 266s 254sh   | 279m      | 266s 252sh   | vPP                             |
|           | 256m         |             |              |           |              |                                 |
| 198m      |              | 194m        |              | 199m      |              | δPO δCCCN                       |
| 155w      |              |             |              |           |              | lattice                         |
| 85m       |              |             |              |           |              |                                 |

Key: s-very strong, s-strong, m-medium, w-weak, vw-very weak; v<sub>s</sub>-symmetric stretching, v<sub>as</sub>-asymmetric stretching, v<sub>s</sub>-symmetric stretching, v<sub>as</sub>-asymmetric stretching, δ<sub>as</sub>-asymmetric bending, δ<sub>s</sub>, δ-symmetric bending (scissoring), ρ-rocking, ω-wagging, τ-twisting (torsion), T-translation, L-libration.
